# Supplementary material for: Is life satisfaction associated with future mental health service use? An observational population-based cohort study
Source: PubMed Central journal article supplement — BMJ Open. 2022 Apr 28;12(4):e050057. doi: 10.1136/bmjopen-2021-050057 (PMC9058709; doi:10.1136/bmjopen-2021-050057), 2022-04-28
Supplement: bmjopen-2021-050057.draft_revisions.pdf [file bmjopen-2021-050057.draft_revisions.pdf]

# BMJ Open

BMJ Open is committed to open peer review. As part of this commitment we make the peer review history of every article we publish publicly available.

When an article is published we post the peer reviewers' comments and the authors' responses online. We also post the versions of the paper that were used during peer review. These are the versions that the peer review comments apply to.

The versions of the paper that follow are the versions that were submitted during the peer review process. They are not the versions of record or the final published versions. They should not be cited or distributed as the published version of this manuscript.

BMJ Open is an open access journal and the full, final, typeset and author-corrected version of record of the manuscript is available on our site with no access controls, subscription charges or pay-per-view fees (<http://bmjopen.bmj.com>).

If you have any questions on BMJ Open's open peer review process please email [info.bmjopen@bmj.com](mailto:info.bmjopen@bmj.com)

# BMJ Open

## Does life satisfaction predict future mental health service use? An observational population-based cohort study

|                               |                                                                                                                                                                                                                                                                                                                                                                                                                                                                               |
|-------------------------------|-------------------------------------------------------------------------------------------------------------------------------------------------------------------------------------------------------------------------------------------------------------------------------------------------------------------------------------------------------------------------------------------------------------------------------------------------------------------------------|
| Journal:                      | <i>BMJ Open</i>                                                                                                                                                                                                                                                                                                                                                                                                                                                               |
| Manuscript ID                 | bmjopen-2021-050057                                                                                                                                                                                                                                                                                                                                                                                                                                                           |
| Article Type:                 | Original research                                                                                                                                                                                                                                                                                                                                                                                                                                                             |
| Date Submitted by the Author: | 10-Feb-2021                                                                                                                                                                                                                                                                                                                                                                                                                                                                   |
| Complete List of Authors:     | Michalski, Camilla; University of Toronto, Dalla Lana School of Public Health<br>Diemert, Lori M.; University of Toronto, Dalla Lana School of Public Health<br>Hurst, Mack; Institute for Clinical Evaluative Sciences; University of Toronto, Dalla Lana School of Public Health<br>Goel, Vivek; Dalla Lana School of Public Health; University of Toronto, Dalla Lana School of Public Health<br>Rosella, Laura; University of Toronto, Dalla Lana School of Public Health |
| Keywords:                     | MENTAL HEALTH, PUBLIC HEALTH, EPIDEMIOLOGY, HEALTH SERVICES ADMINISTRATION & MANAGEMENT                                                                                                                                                                                                                                                                                                                                                                                       |
|                               |                                                                                                                                                                                                                                                                                                                                                                                                                                                                               |

SCHOLARONE™  
Manuscripts

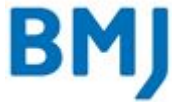

I, the Submitting Author has the right to grant and does grant on behalf of all authors of the Work (as defined in the below author licence), an exclusive licence and/or a non-exclusive licence for contributions from authors who are: i) UK Crown employees; ii) where BMJ has agreed a CC-BY licence shall apply, and/or iii) in accordance with the terms applicable for US Federal Government officers or employees acting as part of their official duties; on a worldwide, perpetual, irrevocable, royalty-free basis to BMJ Publishing Group Ltd ("BMJ") its licensees and where the relevant Journal is co-owned by BMJ to the co-owners of the Journal, to publish the Work in this journal and any other BMJ products and to exploit all rights, as set out in our [licence](#).

The Submitting Author accepts and understands that any supply made under these terms is made by BMJ to the Submitting Author unless you are acting as an employee on behalf of your employer or a postgraduate student of an affiliated institution which is paying any applicable article publishing charge ("APC") for Open Access articles. Where the Submitting Author wishes to make the Work available on an Open Access basis (and intends to pay the relevant APC), the terms of reuse of such Open Access shall be governed by a Creative Commons licence – details of these licences and which [Creative Commons](#) licence will apply to this Work are set out in our licence referred to above.

Other than as permitted in any relevant BMJ Author's Self Archiving Policies, I confirm this Work has not been accepted for publication elsewhere, is not being considered for publication elsewhere and does not duplicate material already published. I confirm all authors consent to publication of this Work and authorise the granting of this licence.

## Does life satisfaction predict future mental health service use? An observational population-based cohort study

Camilla A. Michalski MPH,<sup>a</sup> Lori M. Diemert MSc,<sup>b</sup> Mack Hurst MSc,<sup>c</sup>  
Vivek Goel MD, MSc,<sup>d</sup> Laura C. Rosella\* PhD, MHSc<sup>e</sup>

<sup>a</sup> *Dalla Lana School of Public Health, University of Toronto, Toronto, Ontario, Canada.*

<sup>b</sup> *Dalla Lana School of Public Health, University of Toronto, Toronto, Ontario, Canada.*

<sup>c</sup> *Institute for Clinical Evaluative Sciences, Toronto, Ontario, Canada; Dalla Lana School of Public Health, University of Toronto, Toronto, Ontario, Canada.*

<sup>d</sup> *Dalla Lana School of Public Health, University of Toronto, Toronto, Ontario, Canada; Institute for Health Policy Management and Evaluation, University of Toronto, Toronto, Ontario, Canada; Institute for Clinical Evaluative Sciences, Toronto, Ontario, Canada.*

<sup>e</sup> *Division of Epidemiology, Dalla Lana School of Public Health, University of Toronto, Toronto, Ontario, Canada; Institute for Health Policy Management and Evaluation, University of Toronto, Toronto, Ontario, Canada; Institute for Clinical Evaluative Sciences, Toronto, Ontario, Canada.; Institute for Better Health, Trillium Health Partners, Mississauga, Ontario, Canada*

\*Corresponding Author: Laura C. Rosella, [laura.rosella@utoronto.ca](mailto:laura.rosella@utoronto.ca)  
Health Sciences Building, 155 College Street, Suite 661, Toronto, ON M5T 3M7

**Main body word count: 3,980**

## ABSTRACT

**Objective:** To investigate the impact of life satisfaction on future mental health service use in two settings: (1) hospitals/emergency departments, and (2) outpatient visits.

**Design and setting:** Population-based cohort study of adults from Ontario, Canada. Baseline data were captured through pooled cycles of the Canadian Community Health Survey (CCHS 2005-2014) and linked to health administrative data for up to five years of follow-up.

**Participants:** 131,809 men and women aged 18 years and older.

**Main outcome measure:** The number of mental health-related visits within five-years of follow-up.

**Results:** Poisson regression models were used to estimate rate ratios in each setting, adjusting for sociodemographic measures, visit history, and health behaviours. In the hospital/emergency setting, compared to those most satisfied with life, those with the poorest satisfaction exhibited a rate ratio of 3.71 (95% confidence interval=2.14, 6.45) for future visits. In the outpatient setting, this same comparison group exhibited a rate ratio of 1.83 (95% confidence interval=1.42, 2.37). When the joint effects of household income were considered, compared to the highest income and most satisfied individuals, the lowest income and least satisfied individuals exhibited the highest rate ratio in the hospital/emergency setting (11.25, 95% confidence interval=5.32, 23.80), whereas the highest income and least satisfied individuals exhibited the highest rate ratio in the outpatient setting (3.33, 95% confidence interval=1.65, 6.70).

**Conclusion:** The findings suggest that life satisfaction is an independent risk factor for future mental health visits. Those with the poorest life satisfaction exhibited a disproportionate rate and risk of mental health-related emergency visits, which was less pronounced in the outpatient setting. The magnitude of effect in the hospital/emergency setting was exacerbated when low income was considered. Identifying factors that reduce service use supports the development of upstream socio-ecological interventions for a more sustainable health system.

**Abstract word count: 292**

**Keywords:** mental health; health service use; epidemiology; public health; life satisfaction; wellbeing

## ARTICLE SUMMARY

### Strengths and Limitations

- This large provincially representative study links multiple cycles of the Canadian Community Health Survey with health administrative databases to evaluate the association between life satisfaction and mental health service use in two care settings.
- Insight into participants' history of mental health visits prior to survey interview allowed for more robust analyses that considered baseline mental health status and therefore limited the potential for reverse causation.
- Mental health-related visits to types of care providers that are not captured by the administrative databases could not be accounted for during follow-up, which could confound the reported association.
- Life satisfaction and health behaviours were only measured once at baseline, increasing the potential for misclassification bias.

## INTRODUCTION

Mental and substance use disorders account for approximately 7.4% of all disability-adjusted life-years worldwide, and in Canada, 1 in 5 people live with a mental health problem or illness.<sup>1 2</sup> Mental illness is often accompanied by workforce participation barriers, excess comorbidity, high health care utilization, and shortened life expectancy.<sup>3-5</sup> In Canada's most populous province of Ontario, the burden of mental illness and addictions is estimated to exceed 1.5 times the burden of all cancers, and seven times that of all infectious disease.<sup>6</sup>

In recent years, the idea that the prevention and treatment of mental health issues can have a widespread positive impact on health system outcomes as a whole has been highlighted.<sup>4</sup> This notion also falls in line with the increased attention that measures of psychological wellbeing are gaining among population health researchers and decision-makers. One measure, life satisfaction, is concerned with the subjective evaluation of one's life, and hence broader in scope than transient positive or negative emotions, referring to a global evaluation of one's quality of life. Previous studies support this measure as encompassing mental, physical, and social facets of wellbeing.<sup>3 7 8</sup> Happiness-cultivating interventions, such as positive psychology, drive motivations to study the associations between happiness and health system outcomes.

Several studies have examined associations between life satisfaction and multiple domains of health, such as with health behaviours, chronic disease, death, preventable hospitalizations, general health care use, and mental health, yet to the authors' knowledge, no studies have examined prospective and population-wide associations with subsequent mental health service use.<sup>3 9-11</sup> Using a large, representative population-based cohort, we aim to investigate the impact of life satisfaction on future mental healthcare utilization in two settings: (i) hospitals and emergency departments (EDs), and (ii) outpatient visits.

## METHODS

### *Study population*

Data from five pooled cycles of Statistics Canada's Canadian Community Health Survey (CCHS, cycles 2005, 2007/08, 2009/10, 2011/12, 2013/14) were linked with population-based health administrative databases in Ontario, Canada. Datasets were linked using unique encoded identifiers and analysed at the Institute of Clinical Evaluative Sciences (ICES), which is an independent, non-profit research institute whose legal status under Ontario's health information privacy law allows it to collect and analyse health care and demographic data, without consent, for health system evaluation and improvement.

Administered by Statistics Canada, the CCHS is a cross-sectional survey representative of 98% of the Canadian population aged 12 years or older living in private dwellings. The CCHS gathers data concerning health determinants, use, and outcomes across Canada, with response rates ranging from 66% to 79%. Detailed survey methodology is available elsewhere.<sup>12</sup> All CCHS participants were asked if they consented to share their survey responses with provincial ministries of health and linking responses to administrative databases. Respondents from Ontario who consented to share their survey data were linked to the Registered Persons Database (RPDB), Ontario's universal health insurance registry. Canada has a universal health care system controlled by each province or territory. In Ontario, all permanent residents are covered by a single-payer insurance system known as the Ontario Health Insurance Plan (OHIP) where all related healthcare encounters are recorded in health administrative databases. Each participant had up to five years of follow-up and a three-year lookback window from their baseline CCHS interview.



1  
2  
3  
4 Mental health care utilization was documented in two settings: hospital or ED visits and  
5  
6 outpatient visits. The RPDB was used to obtain age and sex for all participants. Measures of life  
7  
8 satisfaction, health behaviours, and other sociodemographic measures were obtained from the CCHS.  
9

10  
11 Pooling the Ontario component of the five selected CCHS cycles (N=213,687), 167,442  
12  
13 participants were successfully linked to the RPDB. After removing duplicate records, those with  
14  
15 invalid death dates or postal codes, those under 18 years of age, those missing life satisfaction  
16  
17 measures, those who were never eligible for OHIP during follow-up, 131,809 respondents were  
18  
19 included (Figure 1).  
20  
21  
22  
23  
24

## 25 **Measures**

26  
27 *Exposure:* The focal exposure was a one-item measure of self-reported life satisfaction. All  
28  
29 CCHS respondents were prompted with the question: *How satisfied are you with your life in general?*  
30  
31 For cycles 2005 and 2007/08, CCHS respondents were directly given five response options: *very*  
32  
33 *satisfied, satisfied, neither satisfied nor dissatisfied, dissatisfied, or very dissatisfied.* For cycles  
34  
35 2009/10, 2011/12, 2013/14, the response option was an 11-point scale (from 0 labelled *very dissatisfied*  
36  
37 to 10 labelled *very satisfied*), which was then converted to the same 5-point scale by Statistics Canada.  
38  
39 For the purpose of this study, *very satisfied and satisfied* response levels were collapsed due to  
40  
41 perceived similarity with mental health outcomes. As mentioned, this single item measure has been  
42  
43 shown to be reliable and valid, as well as a moderately stable measure over time.<sup>13-16</sup> Compared to  
44  
45 multi-item measures, this single measure has been shown to capture information very similarly to  
46  
47 multidimensional measures.<sup>17</sup>  
48  
49  
50  
51  
52  
53

54 *Outcome:* The primary outcome was a count of the number of mental health visits in either of  
55  
56 the two settings in the five years following interview date. Secondary analyses were conducted to  
57  
58  
59  
60

1  
2  
3  
4 examine binary measures of having ever had a mental health visit in five years of follow-up. Hospital  
5  
6 admissions were identified from the Canadian Institute for Health Information Discharge Abstract  
7  
8 Database (CIHI-DAD) (2002–2019) and the Ontario Mental Health Reporting System (OMHRS)  
9  
10 (2005–2019). ED visits were obtained through the National Ambulatory Care Reporting System  
11  
12 (NACRS) (2002–2019). Outpatient visits (defined as a visit to a primary care physician for any mental  
13  
14 health condition or to a psychiatrist for any reason) were determined from the OHIP billings database  
15  
16 between 2002 and 2019 (Supplementary Table 1).  
17  
18  
19  
20

21 *Covariates:* Having had any prior mental health service use (in either of the two defined  
22  
23 settings) was estimated from administrative data captured in the three years before the baseline  
24  
25 interview for each participant. All other covariates were captured in the CCHS and included survey  
26  
27 interview year, immigrant status, household income, smoking, alcohol consumption, physical activity  
28  
29 level and body mass index (BMI). These variables were chosen as they have been shown to be  
30  
31 important confounders in the relationship between life satisfaction and health system and population  
32  
33 health outcomes in previous studies.<sup>9-11</sup>  
34  
35  
36  
37  
38

### 39 ***Statistical Analyses***

40  
41 The distributions of mental health care service use and selected covariates were estimated  
42  
43 according to the four defined categorizations of life satisfaction (*very satisfied/satisfied; neither*  
44  
45 *satisfied nor dissatisfied; dissatisfied; very dissatisfied*).  
46  
47  
48

49 Poisson regression models were used to estimate rate ratios of mental health visits in  
50  
51 hospital/ED or outpatient settings with a person-days offset. In addition, we estimated risk ratios for the  
52  
53 binary outcome ever/never having had a subsequent visit in each setting. Estimates from four  
54  
55 sequentially adjusted models were reported to transparently demonstrate the impact of the various  
56  
57  
58  
59  
60

1  
2  
3  
4 adjustments: (i) unadjusted; (ii) age-, sex-, and survey cycle-adjusted; (iii) minimally adjusted; and (iv)  
5  
6 fully adjusted. Minimally adjusted models included age, sex, survey cycle, immigrant status, and  
7  
8 household income quintile. Fully adjusted models additionally adjusted for having had any mental  
9  
10 health visit three years prior to the baseline interview, smoking status, alcohol consumption, physical  
11  
12 activity level, and BMI. To examine whether the association between life satisfaction and counts of  
13  
14 mental health visits varied by socioeconomic status, fully adjusted joint-effects models were conducted  
15  
16 which included a 12-category joint-effects variable combining life satisfaction with a collapsed  
17  
18 measure of household income (*low income*, quintile 1/*mid income*, quintiles 2 and 3/*high income*,  
19  
20 quintiles 4 and 5).  
21  
22  
23  
24

25  
26 Median values were imputed for all missing observations. Income had the highest proportion of  
27  
28 missing observations at 6.3% and we conducted a separate sensitivity analysis where missing  
29  
30 observations were coded as a separate category. We conducted another sensitivity analysis to limit the  
31  
32 potential influence of reverse causation and capture any baseline mental illness that may have  
33  
34 influenced life satisfaction by estimating models wherein participants with any documented mental  
35  
36 health visit within their three-year lookback window or one year following their interview day were  
37  
38 excluded. Finally, a third sensitivity analysis excluded participants who lost OHIP eligibility for one  
39  
40 year.  
41  
42  
43  
44

45 Pooled survey weights were used to adjust for the complex survey design of the CCHS and  
46  
47 provide provincially representative estimates. Bootstrap weights were applied using balanced repeated  
48  
49 replication to estimate variance.<sup>18</sup> Statistical analyses were performed in 2020 using SAS version 9.3  
50  
51 and Stata version 15.1.  
52  
53  
54  
55  
56  
57  
58  
59  
60

## Patient and Public Involvement

Patients were not involved in the development of the research question, outcome measures, recruitment, design or the implementation of the study objectives. Furthermore, no patients were consulted on the interpretation of results, and there are no **specific** plans to disseminate the results to **patients**.

## RESULTS

Of the study cohort, 90.9% reported being very satisfied or satisfied with life, 5.8% reported being neither satisfied nor dissatisfied, 2.7% reported being dissatisfied, and 0.6% reported being very dissatisfied. Those who reported being very dissatisfied with life were older (mean age of 51.8 years versus 45.7, compared to those reporting being satisfied), more likely to be in the lowest household income quintile (48.8% versus 15.3%), current smokers (41.7% versus 18.6%), non-drinkers (35.3% versus 19.9%), physically inactive (70.2% versus 46.8%), underweight or very obese, and have had any mental health visit in both lookback and follow-up windows (Table 1). The mean follow-up time (which was only censored by death date) was 4.93 years.

**Table 1:** Proportion (%) and mean<sup>a</sup> characteristics for pooled participants surveyed from 2005 to 2014 (N=131,809), Canadian Community Health Survey, Ontario, Canada.

|                                   | Life Satisfaction      |                          |                      |                           |                              |
|-----------------------------------|------------------------|--------------------------|----------------------|---------------------------|------------------------------|
|                                   | Overall<br>(N=131,809) | Satisfied<br>(n=119,543) | Neither<br>(n=7,541) | Dissatisfied<br>(n=3,745) | Very dissatisfied<br>(n=980) |
| <b>Mean<sup>a</sup></b>           |                        |                          |                      |                           |                              |
| <b>Age</b>                        | 46.0                   | 45.7                     | 48.4                 | 48.9                      | 51.8                         |
| <b>Total # hospital/ED visits</b> | 0.07                   | 0.06                     | 0.16                 | 0.28                      | 0.53                         |
| <b>Total # outpatient visits</b>  | 2.9                    | 2.5                      | 5.4                  | 9.4                       | 8.6                          |
| <b>%<sup>a</sup></b>              |                        |                          |                      |                           |                              |
| <b>Sex</b>                        |                        |                          |                      |                           |                              |
| Female                            | <b>51.1</b>            | 51.0                     | 54.0                 | 50.1                      | 51.7                         |
| Male                              | <b>48.9</b>            | 49.0                     | 46.0                 | 49.3                      | 48.3                         |
| <b>CCHS Cycle</b>                 |                        |                          |                      |                           |                              |

## Life satisfaction and mental health service use

Michalski 1

|                                                                  |             |      |      |      |      |
|------------------------------------------------------------------|-------------|------|------|------|------|
| 2005/06                                                          | <b>16.2</b> | 16.2 | 16.0 | 17.1 | 13.4 |
| 2007/09                                                          | <b>22.3</b> | 22.1 | 23.8 | 24.1 | 21.0 |
| 2009/10                                                          | <b>23.0</b> | 23.0 | 23.4 | 22.4 | 20.3 |
| 2011/12                                                          | <b>23.3</b> | 23.5 | 21.3 | 22.9 | 25.1 |
| 2013/14                                                          | <b>15.1</b> | 15.1 | 15.5 | 13.6 | 20.2 |
| <b>Immigrant</b>                                                 |             |      |      |      |      |
| No                                                               | <b>67.3</b> | 68.1 | 56.4 | 64.7 | 69.3 |
| Yes                                                              | <b>32.7</b> | 31.9 | 43.6 | 35.3 | 30.7 |
| <b>Household income</b>                                          |             |      |      |      |      |
| Q1 (Lowest)                                                      | <b>16.9</b> | 15.3 | 29.4 | 40.0 | 48.8 |
| Q2                                                               | <b>17.4</b> | 17.0 | 22.1 | 19.7 | 15.9 |
| Q3                                                               | <b>26.0</b> | 26.1 | 26.8 | 22.3 | 17.9 |
| Q4                                                               | <b>19.2</b> | 20.0 | 12.4 | 9.3  | 8.1  |
| Q5 (Highest)                                                     | <b>20.5</b> | 21.6 | 9.3  | 8.7  | 9.3  |
| <b>Smoking status</b>                                            |             |      |      |      |      |
| Non-smoker                                                       | <b>58.3</b> | 59.3 | 51.3 | 44.0 | 34.9 |
| Former                                                           | <b>21.9</b> | 22.1 | 19.4 | 20.9 | 21.5 |
| Current                                                          | <b>19.8</b> | 18.6 | 29.4 | 35.1 | 41.7 |
| <b>Alcohol consumption</b>                                       |             |      |      |      |      |
| No past-year                                                     | <b>20.6</b> | 19.9 | 27.0 | 28.1 | 35.3 |
| Occasional                                                       | <b>16.3</b> | 15.8 | 21.3 | 22.7 | 21.5 |
| Regular                                                          | <b>28.3</b> | 28.8 | 24.1 | 21.4 | 17.0 |
| Regular & binge                                                  | <b>34.8</b> | 35.5 | 27.6 | 27.8 | 26.2 |
| <b>Physical activity<sup>b</sup></b>                             |             |      |      |      |      |
| Active                                                           | <b>26.4</b> | 27.4 | 17.1 | 15.9 | 15.9 |
| Moderate                                                         | <b>25.1</b> | 25.7 | 19.1 | 18.8 | 13.9 |
| Inactive                                                         | <b>48.5</b> | 46.8 | 63.8 | 65.3 | 70.2 |
| <b>Body mass index</b>                                           |             |      |      |      |      |
| Underweight (<18.5)                                              | <b>2.6</b>  | 2.4  | 3.8  | 3.8  | 6.5  |
| Normal (18.5-24.9)                                               | <b>43.7</b> | 44.3 | 39.4 | 35.4 | 33.7 |
| Overweight (25-29.9)                                             | <b>36.6</b> | 36.7 | 36.6 | 34.7 | 35.6 |
| Mod obese (30-34.9)                                              | <b>12.1</b> | 11.9 | 12.9 | 15.3 | 13.0 |
| Very obese (≥35)                                                 | <b>5.0</b>  | 4.7  | 7.3  | 10.8 | 11.3 |
| <b>Hospital or emergency department visit (5-year follow-up)</b> |             |      |      |      |      |
| No                                                               | <b>96.3</b> | 96.8 | 93.3 | 88.4 | 84.3 |
| Yes                                                              | <b>3.7</b>  | 3.2  | 6.7  | 11.6 | 15.7 |
| <b>Outpatient visit (5-year follow-up)</b>                       |             |      |      |      |      |
| No                                                               | <b>62.1</b> | 63.8 | 50.0 | 37.8 | 32.6 |
| Yes                                                              | <b>37.9</b> | 36.2 | 50.0 | 62.2 | 67.4 |
| <b>Any MH visit (3-year lookback)</b>                            |             |      |      |      |      |
| No                                                               | <b>69.9</b> | 71.6 | 56.7 | 44.8 | 41.7 |
| Yes                                                              | <b>30.1</b> | 28.4 | 43.3 | 55.2 | 58.3 |

<sup>a</sup> Survey sampling weights were used to produce population estimates.

Compared to those reporting being most satisfied with life, those who reported being very

dissatisfied exhibited a fully adjusted rate ratio of 3.71 (95% CI: 2.14, 6.45) for a future hospital/ED visit. In the outpatient setting, the same comparison group exhibited a fully adjusted rate ratio of 1.83 (95% CI: 1.42, 2.37). Covariate adjustments attenuated the magnitude of the life satisfaction effect (i.e., the unadjusted to fully adjusted rate ratios decreased from 9.48 to 3.71 in the hospital/ED setting and from 3.66 to 1.83 in the outpatient setting). Adjustment for prior mental health visits and health behaviours at baseline resulted in the most substantial decrease in effect size (Table 2).

**Table 2:** Rate ratios<sup>a</sup> and 95% confidence intervals for counts of (i) hospitalization or emergency department visits, or (ii) outpatient visits for any mental health condition. Source: pooled participants surveyed from 2005 to 2014 (N=131,809), Canadian Community Health Survey, Ontario, Canada.

|                                               | Unadjusted         | Age, sex, cycle-adjusted | Minimally adjusted <sup>b</sup> | Fully adjusted <sup>c</sup> |
|-----------------------------------------------|--------------------|--------------------------|---------------------------------|-----------------------------|
| <b>Hospital or emergency department visit</b> |                    |                          |                                 |                             |
| <i>Very satisfied or satisfied</i>            | Ref.               | Ref.                     | Ref.                            | Ref.                        |
| <i>Neither</i>                                | 2.86 (1.92, 4.27)  | 3.08 (2.05, 4.62)        | 2.63 (1.77, 3.90)               | 1.89 (1.30, 2.73)           |
| <i>Dissatisfied</i>                           | 4.93 (3.91, 6.21)  | 5.40 (4.29, 6.80)        | 3.81 (2.96, 4.91)               | 2.29 (1.77, 2.96)           |
| <i>Very dissatisfied</i>                      | 9.48 (5.59, 16.08) | 10.98 (6.49, 18.60)      | 7.00 (4.09, 11.99)              | 3.71 (2.14, 6.45)           |
| <b>Outpatient visit</b>                       |                    |                          |                                 |                             |
| <i>Very satisfied or satisfied</i>            | Ref.               | Ref.                     | Ref.                            | Ref.                        |
| <i>Neither</i>                                | 2.24 (1.97, 2.56)  | 2.27 (1.99, 2.59)        | 2.24 (1.96, 2.56)               | 1.62 (1.42, 1.84)           |
| <i>Dissatisfied</i>                           | 3.92 (3.33, 4.62)  | 4.03 (3.42, 4.75)        | 3.67 (3.11, 4.33)               | 2.20 (1.88, 2.58)           |
| <i>Very dissatisfied</i>                      | 3.66 (2.85, 4.71)  | 3.84 (2.97, 4.95)        | 3.31 (2.56, 4.29)               | 1.83 (1.42, 2.37)           |

<sup>a</sup> Multivariable adjusted rate ratios from Poisson regressions (with balanced repeated replication to produce 95% confidence intervals) for a count of the number of (i) hospitalization or emergency department visits, or (ii) outpatient visits for any mental health condition, per person-days of follow-up up to 5 years following interview.

<sup>b</sup> Minimally adjusted model includes age, sex, survey cycle, immigrant status, and household income.

<sup>c</sup> Fully adjusted model includes age, sex, survey cycle, immigrant status, household income, having had any mental health visit in the three years prior to survey interview, smoking status, alcohol consumption, physical activity level, and body mass index.

Across all levels of adjustment in the hospital/ED setting, a dose-response effect was observed for decreasing levels of life satisfaction: higher rate ratios for having any mental health hospital/ED visit were observed among individuals more dissatisfied with their lives. This dose-response relationship was less pronounced in the outpatient setting. Examining the outcomes as binary measures (having had at least one visit during follow-up), the dose-response relationship was again less

pronounced in the outpatient setting. Those reporting the poorest level of life satisfaction exhibited the highest relative risk of having at least one hospital/ED visit (relative risk: 2.58, 95% CI: 1.92, 3.47), as well as the highest risk of having an outpatient visit (relative risk: 1.38, 95% CI: 1.28, 1.50) (Table 3).

**Table 3:** Risk ratios<sup>a</sup> and 95% confidence intervals for risks of (i) hospitalization or emergency department visit, or (ii) outpatient visit for any mental health condition. Source: pooled participants surveyed from 2005 to 2014 (N=131,809), Canadian Community Health Survey, Ontario, Canada.

|                                               | Unadjusted        | Age, sex, cycle-adjusted | Minimally adjusted <sup>b</sup> | Fully adjusted <sup>c</sup> |
|-----------------------------------------------|-------------------|--------------------------|---------------------------------|-----------------------------|
| <b>Hospital or emergency department visit</b> |                   |                          |                                 |                             |
| <i>Very satisfied or satisfied</i>            | Ref.              | Ref.                     | Ref.                            | Ref.                        |
| <i>Neither</i>                                | 2.12 (1.78, 2.53) | 2.23 (1.87, 2.65)        | 2.02 (1.71, 2.40)               | 1.58 (1.33, 1.87)           |
| <i>Dissatisfied</i>                           | 3.73 (3.18, 4.38) | 3.99 (3.40, 4.68)        | 3.16 (2.69, 3.71)               | 2.15 (1.84, 2.52)           |
| <i>Very dissatisfied</i>                      | 5.12 (3.84, 6.83) | 5.77 (4.31, 7.72)        | 4.22 (3.14, 5.67)               | 2.58 (1.92, 3.47)           |
| <b>Outpatient visit</b>                       |                   |                          |                                 |                             |
| <i>Very satisfied or satisfied</i>            | Ref.              | Ref.                     | Ref.                            | Ref.                        |
| <i>Neither</i>                                | 1.40 (1.34, 1.46) | 1.38 (1.33, 1.44)        | 1.37 (1.32, 1.43)               | 1.18 (1.13, 1.23)           |
| <i>Dissatisfied</i>                           | 1.76 (1.68, 1.84) | 1.76 (1.68, 1.84)        | 1.70 (1.62, 1.78)               | 1.33 (1.27, 1.38)           |
| <i>Very dissatisfied</i>                      | 1.93 (1.80, 2.07) | 1.93 (1.79, 2.08)        | 1.84 (1.70, 1.98)               | 1.38 (1.28, 1.50)           |

<sup>a</sup> Multivariable adjusted risk ratios from Poisson regressions (with balanced repeated replication to produce 95% confidence intervals) comparing those who had at least one (i) hospitalization or emergency department visit, or (ii) outpatient visit for any mental health condition, per person-days of follow-up up to 5 years following interview.

<sup>b</sup> Minimally adjusted model includes age, sex, survey cycle, immigrant status, and household income.

<sup>c</sup> Fully adjusted model includes age, sex, survey cycle, immigrant status, household income, having had any mental health visit in the three years prior to survey interview, smoking status, alcohol consumption, physical activity level, and body mass index.

The life satisfaction and household income joint-effects models showed that compared to the most satisfied, high income group, individuals very dissatisfied with life who also had the lowest household income exhibited a fully adjusted rate ratio of 11.25 (95% CI: 5.32, 23.80) in the hospital/ED setting, which differed substantially from the fully adjusted rate ratio for those very dissatisfied with life presented in Table 2 (rate ratio = 3.71). In the outpatient setting, the rate ratio for the very dissatisfied, low income group was lower than that of the very dissatisfied, high income group



(rate ratios of 1.84 and 3.33, respectively) (Table 4).

**Table 4:** Joint-effects of life satisfaction and income on counts of (i) hospitalization or emergency department visits, or (ii) outpatient visits for any mental health condition. Source: pooled participants surveyed from 2005 to 2014 (N=131,809), Canadian Community Health Survey, Ontario, Canada.

| <b>Hospital or emergency department visit</b> |                     |
|-----------------------------------------------|---------------------|
| <i>Satisfied &amp; high income</i>            | Ref.                |
| <i>Satisfied &amp; mid income</i>             | 1.37 (1.08, 1.73)   |
| <i>Satisfied &amp; low income</i>             | 2.93 (2.23, 3.84)   |
| <i>Neither &amp; high income</i>              | 0.96 (0.67, 1.39)   |
| <i>Neither &amp; mid income</i>               | 2.73 (1.71, 4.35)   |
| <i>Neither &amp; low income</i>               | 6.10 (3.20, 11.61)  |
| <i>Dissatisfied &amp; high income</i>         | 2.74 (1.54, 4.86)   |
| <i>Dissatisfied &amp; mid income</i>          | 4.39 (2.57, 7.50)   |
| <i>Dissatisfied &amp; low income</i>          | 5.33 (3.81, 7.45)   |
| <i>Very dissatisfied &amp; high income</i>    | 6.20 (3.62, 10.64)  |
| <i>Very dissatisfied &amp; mid income</i>     | 3.04 (1.70, 5.43)   |
| <i>Very dissatisfied &amp; low income</i>     | 11.25 (5.32, 23.80) |
| <b>Outpatient visits</b>                      |                     |
| <i>Satisfied &amp; high income</i>            | Ref.                |
| <i>Satisfied &amp; mid income</i>             | 0.89 (0.79, 1.00)   |
| <i>Satisfied &amp; low income</i>             | 1.13 (1.00, 1.28)   |
| <i>Neither &amp; high income</i>              | 1.50 (1.31, 2.27)   |
| <i>Neither &amp; mid income</i>               | 1.47 (1.23, 1.83)   |
| <i>Neither &amp; low income</i>               | 1.64 (1.32, 2.04)   |
| <i>Dissatisfied &amp; high income</i>         | 2.09 (1.55, 2.82)   |
| <i>Dissatisfied &amp; mid income</i>          | 1.94 (1.45, 2.60)   |
| <i>Dissatisfied &amp; low income</i>          | 2.51 (1.98, 3.18)   |
| <i>Very dissatisfied &amp; high income</i>    | 3.33 (1.65, 6.70)   |
| <i>Very dissatisfied &amp; mid income</i>     | 1.37 (1.03, 1.83)   |
| <i>Very dissatisfied &amp; low income</i>     | 1.84 (1.29, 2.63)   |

<sup>a</sup> Multivariable adjusted rate ratios from Poisson regressions (with balanced repeated replication to produce 95% confidence intervals) for a count of the number of (i) hospitalization or emergency department visits, or (ii) outpatient visits for any mental health condition, per person-days of follow-up up to 5 years following interview.

<sup>b</sup> Fully adjusted model includes age, sex, survey cycle, immigrant status, household income, having had any mental health visit in the three years prior to survey interview, smoking status, alcohol consumption, physical activity level, and body mass index.



### *Sensitivity analyses*

In our count models that excluded participants with a history of a mental health visits or in the first year following their CCHS interview, the overall magnitude and direction of all rates remained consistent. However, rate ratios for those reporting being neither satisfied nor dissatisfied became statistically insignificant in both settings and due to small cell counts, there was considerable uncertainty around the estimate for those reporting being very dissatisfied in the hospital/ED setting (Supplementary Table 2). In the second sensitivity analysis (excluding participants who lost OHIP eligibility for one consecutive year or more), all estimates' general magnitude and direction remained consistent (Supplementary Table 3). Categorizing missing income observations as a separate response category resulted in no meaningful differences (Supplementary Table 4).

### **DISCUSSION**

Using a population-based cohort representative of Ontarian adults, we found that poorer life satisfaction is associated with increased mental health service use in both emergency and outpatient settings. Following adjustment for sociodemographic measures, mental health visit history, and health behaviours, point estimates were attenuated but still present. A dose-response relationship between life satisfaction and mental health visits was observed, and notably less pronounced in the outpatient setting for count and binary models. The findings of our joint-effects models showed that low household income substantially increased the magnitude of the rate ratio of hospital/ED visits for those least satisfied with life, which was not the case for this group in the outpatient setting.

Potential biological, behavioural, and socio-ecological pathways could explain the association between life satisfaction and mental health service use. In terms of biological plausibility, previous studies have shown that reported life satisfaction is associated with elevated cortisol levels and decreased serum antioxidants which could impact mental health, though the impact was attenuated

1  
2  
3  
4 once sociodemographic characteristics were adjusted for.<sup>19 20</sup> Regarding health behaviours, longitudinal  
5  
6 studies have shown subjective wellbeing measures to be predictive of physical activity levels, diet,  
7  
8 smoking, and alcohol consumption, which are also influential of mental wellbeing and health service  
9  
10 use.<sup>21 22</sup> These findings further support the idea that people who are of lower socioeconomic status  
11  
12 experience barriers to long-term and sustained mental health care. This may suggest that those with the  
13  
14 poorest life satisfaction face both internal and external barriers to accessing continued, long-term  
15  
16 mental health care, such as in the outpatient setting studied. Indeed, studies have shown that individuals  
17  
18 reporting emotional distress and unmet mental health needs are more likely to experience affordability,  
19  
20 medication, and trust-related barriers, as well as increased likelihood of not wanting to see a  
21  
22 professional.<sup>23</sup> A similar pattern was observed in an evaluation of the impact of life satisfaction on  
23  
24 ambulatory care sensitive conditions, wherein the joint-effects of income substantially increased the  
25  
26 magnitude of effect.<sup>9</sup>  
27  
28  
29  
30  
31

32 Repeated hospital/ED visits point to access challenges and gaps in long-term health care, and  
33  
34 cyclically, this further contributes to the overcrowding of EDs observed across Canada. However,  
35  
36 shifting the hospital/ED burden strictly to the clinical outpatient setting is not sustainable for Canada's  
37  
38 growing mental health burden, nor is it in the patient's best interest. There are currently known delays  
39  
40 in wait times for counselling and therapy of six months to one year, too long for effective care.<sup>24 25</sup> The  
41  
42 majority (80%) of Canadians already seek care from their primary care physician, of whom only 23%  
43  
44 report feeling prepared for severe mental health problems.<sup>25</sup> There exists a comprehensive need for  
45  
46 accessible mental health care, which is only deepening with time. A preventative framework that  
47  
48 considers life contexts outside of the health system may help quell the current overwhelming demand  
49  
50 for services through the development and employment of community interventions. Previous studies  
51  
52 have demonstrated that enrichment of life satisfaction can enhance psychological wellbeing, which in  
53  
54  
55  
56  
57  
58  
59  
60

1  
2  
3  
4 turn could prevent future mental health issues.<sup>26</sup> In this way, expanding community capacities and  
5  
6 optimizing built environments to improve quality of life, such as through improvements to food  
7  
8 availability, public transport accessibility, neighbourhood walkability, and opportunities for social and  
9  
10 civic engagement, are potential avenues to improve both life satisfaction and mental health.  
11  
12

### 13 14 ***Limitations***

15  
16  
17 Our study has a number of limitations that should be considered when interpreting the findings.  
18  
19 It is possible that the associations observed heavily reflect the negative influence of baseline poor  
20  
21 mental health on life satisfaction. In fact, other studies have found that mental illness and negative  
22  
23 affect are key determinants of individual perceptions of life satisfaction.<sup>3 27</sup> However, the cohort study  
24  
25 design (which is a key advantage over previous studies) and the results of our sensitivity analysis  
26  
27 (wherein participants with any mental health visit in the three years prior to interview or in the first  
28  
29 year following the interview were excluded) showed that prospective associations remained robust.  
30  
31 Still, we could not account for mental illness or negative affect uncaptured by the mental health service  
32  
33 system, which could confound reported life satisfaction and subsequent service use.<sup>2</sup> Another limitation  
34  
35 to consider is that life satisfaction measures were only measured once at baseline. This means that  
36  
37 changes in life satisfaction that may influence the outcome are not captured. While changes in life  
38  
39 satisfaction over the five-year follow-up window pose less of a threat due to this measurement's  
40  
41 stability over time<sup>28 29</sup>, health behaviours such as smoking and drinking could have changed more  
42  
43 substantially. The potential misclassification of health behaviours may affect the confounding control  
44  
45 of our model's health behaviours, which we note were important. We were also unable to distinguish  
46  
47 between different types of mental health visits, given that billing codes for conditions are not validated  
48  
49 for any mental health conditions other than schizophrenia.<sup>30</sup> Therefore, they represent health service  
50  
51 use for mental health and should not be interpreted as a diagnosis for a particular mental health  
52  
53  
54  
55  
56  
57  
58  
59  
60

1  
2  
3  
4 condition. Lastly, our findings are not directly applicable to sub-populations not in the sampling frame  
5  
6 for the CCHS. Unrepresented populations include Indigenous populations living on reserve, individuals  
7  
8 in the military, and those living in institutions.  
9

## 10 11 12 **Conclusion** 13

14  
15 Our study contributes to a growing body of evidence that highlights the relevance of broader  
16  
17 indicators of wellbeing and their influence on health system outcomes. The findings of this study  
18  
19 support the incorporation of health indicators that consider socio-ecological perspectives on mental  
20  
21 health (and health in general). Socio-ecological perspectives recognize the influence of broader life  
22  
23 contexts and perceptions of wellbeing on our health, underscoring the need for a preventive framework  
24  
25 which becomes especially relevant in light of the growing burden of mental illness in Canada. Future  
26  
27 research that supports how life satisfaction can be modified through population- and community-based  
28  
29 interventions and social programs is warranted.  
30  
31  
32  
33  
34  
35  
36  
37  
38  
39  
40  
41  
42  
43  
44  
45  
46  
47  
48  
49  
50  
51  
52  
53  
54  
55  
56  
57  
58  
59  
60

Life satisfaction and mental health service use

1  
2  
3  
4 **Figure captions:**

5 **Figure 1.** Flow chart of study population from pooled Ontario components of Statistics Canada's  
6 Canadian Community Health Surveys (CCHS, 2005-2014) linked to health administrative data through  
7 the Registered Persons Database (RPDB).  
8  
9  
10

11  
12 **REQUIRED STATEMENTS**

13  
14 **Author contributions:** CAM contributed to the design, analysis, and interpretation of data, and drafted  
15 the article; LMD contributed to the design and interpretation of data, and critically revised the article;  
16 MH contributed to the analysis of data, and critically revised the article; VG contributed to the design  
17 and interpretation of the study, and critically revised the article; LCR contributed to the conception,  
18 design, and interpretation of data, and critically revised the article. All authors have given final  
19 approval of the version to be published, and LCR has agreed to act as the guarantor of the work.  
20  
21  
22  
23  
24  
25  
26  
27  
28  
29

30 **Competing interests:** None declared.  
31  
32  
33  
34

35 **Funding Information:** LCR is funded by a Canada Research Chair (950-230702).  
36  
37  
38  
39

40 **Data sharing:** The dataset from this study is held securely in coded form at ICES. While data sharing  
41 agreements prohibit ICES from making the dataset publicly available, access may be granted to those  
42 who meet pre-specified criteria for confidential access, available at [www.ices.on.ca/DAS](http://www.ices.on.ca/DAS). The full  
43 dataset creation plan and underlying analytic code are available from the authors upon request,  
44 understanding that the computer programs may rely upon coding templates or macros that are unique to  
45 ICES and are therefore either inaccessible or may require modification.  
46  
47  
48  
49  
50  
51

52 **Ethical approval:** The study design received ethics approval from the University of Toronto's ethics  
53 board (protocol #00039444).  
54  
55  
56  
57  
58  
59  
60

**Acknowledgements:** This study was supported by ICES, which is funded by an annual grant from the Ontario Ministry of Health and Long-Term Care (MOHLTC). Parts of this material are based on data and information compiled and provided by: MOHLTC and Canadian Institute for Health Information (CIHI). The analyses, conclusions, opinions and statements expressed herein are solely those of the authors and do not reflect those of the funding or data sources; no endorsement is intended or should be inferred.

## References

1. Whiteford HA, Degenhardt L, Rehm J, et al. Global burden of disease attributable to mental and substance use disorders: findings from the Global Burden of Disease Study 2010. *Lancet* 2013;382(9904):1575-86. doi: [https://doi.org/10.1016/S0140-6736\(13\)61611-6](https://doi.org/10.1016/S0140-6736(13)61611-6)
2. Mental Health Commission of Canada. Annual Report 2009-2010: On Our Way. In: Canada MHC, ed. Calgary, Alberta: Mental Health Commission of Canada, 2010.
3. Lombardo P, Jones W, Wang L, et al. The fundamental association between mental health and life satisfaction: results from successive waves of a Canadian national survey. *BMC Public Health* 2018;18:342. doi: 10.1186/s12889-018-5235-x
4. Prince M, Patel V, Saxena S, et al. No health without mental health. *Lancet* 2007;370(9590):859-77. doi: 10.1016/S0140-6736(07)61238-0
5. World Health Organization. Mental health action plan 2013 - 2020. Geneva, Switzerland: World Health Organization, 2013:1-45.
6. Ratnasingham S, Cairney J, Rehm J, et al. Opening Eyes, Opening Minds: The Ontario Burden of Mental Illness and Addictions Report. Toronto: Institute for Clinical and Evaluative Sciences and Public Health Ontario, 2012.
7. Helliwell JF, Aknin LB. Expanding the social science of happiness. *Nat Hum Behav* 2018;2(4):248-52. doi: 10.1038/s41562-018-0308-5
8. Diener E, Chan MY. Happy people live longer: subjective well-being contributes to health and longevity. *Appl Psychol: Health Well-Being* 2011;3(1):1-43.
9. DeProphetis E, Goel V, Watson T, et al. The relationship between life satisfaction and preventable hospitalizations: a population-based cohort study in Ontario, Canada *BMJ Open* 2020;In Press
10. Rosella L, Longdi F, Buajitti E, et al. Death and chronic disease risk associated with poor life satisfaction: a population-based cohort study. *Am J Epidemiol* 2018;188(2):323-31.
11. Goel V, Rosella LC, Longdi F, et al. The relationship between life satisfaction and healthcare utilization: A longitudinal study. *Am J Prev Med* 2018;55(2):142-50.
12. Beland Y. Canadian Community Health Survey, Methodological overview. *Health Rep* 2002;13(3):9-14.
13. Diener E, Inglehart R, Tay L. Theory and validity of life satisfaction scales. *Soc Indic Res* 2013;112(3):497-527. doi: 10.1007/s11205-012-0076-y

14. Lucas RE, Donnellan MB. How stable is happiness? Using the STARTS model to estimate the stability of life satisfaction. *J Res Pers* 2007;41(5):1091-98. doi: 10.1016/j.jrp.2006.11.005
15. Schimmack U, Diener E, Oishi S. Life-satisfaction is a momentary judgment and a stable personality characteristic: the use of chronically accessible and stable sources. *J Res Pers* 2002;70(3):345-84. doi: 10.1111/1467-6494.05008 [published Online First: 2002/06/07]
16. Bonikowska A, Helliwell JF, Hou F, et al. An assessment of life satisfaction responses on recent Statistics Canada surveys. *Soc Indic Res* 2014;118(2):617-43.
17. Cheung F, Lucas RE. Assessing the validity of single-item life satisfaction measures: results from three large samples. *Qual Life Res* 2014;23(10):2809-18. doi: 10.1007/s11136-014-0726-4
18. Kolenikov S. Resampling variance estimation for complex survey data. *Stata Journal* 2010;10(2):165-99.
19. McEwen BS. Protective and damaging effects of stress mediators: central role of the brain. *Dialogues Clin Neurosci* 2006;8(4):367-81. doi: 10.31887/DCNS.2006.8.4/bmcewen [published Online First: 2007/02/13]
20. Smith A, Baum A. The influence of psychological factors on restorative function in health and illness. In J. Suls & K. A. Wallston (Eds.), *Blackwell series in health psychology and behavioral medicine. Social psychological foundations of health and illness* (p. 432–457). Blackwell Publishing. <https://doi.org/10.1002/9780470753552.ch16>
21. White RL, Babic MJ, Parker PD, et al. Domain-specific physical activity and mental health: A meta-analysis. *Am J Prev Med* 2017;52(5):653-66. doi: 10.1016/j.amepre.2016.12.008 [published Online First: 2017/02/06]
22. Boehm JK, Chen Y, Koga H, et al. Is optimism associated with healthier cardiovascular-related behavior? Meta-analyses of 3 health behaviors. *Circ Res* 2018;122(8):1119-34. doi: 10.1161/circresaha.117.310828 [published Online First: 2018/04/14]
23. Corscadden L, Callander EJ, Topp SM. Who experiences unmet need for mental health services and what other barriers to accessing health care do they face? Findings from Australia and Canada. *Int J Health Plan Manag* 2019;34(2):761-72. doi: 10.1002/hpm.2733 [published Online First: 2019/01/19]
24. Lysyk B. Annual report In: Ontario OotAGo, ed. Toronto: Queen's Printer for Ontario, 2016.
25. Centre for Addictions and Mental Health. Mental illness and addiction: facts and statistics. 2020 [Available from: <https://www.camh.ca/en/driving-change/the-crisis-is-real/mental-health-statistics>].
26. Sin NL, Lyubomirsky S. Enhancing well-being and alleviating depressive symptoms with positive psychology interventions: a practice-friendly meta-analysis. *Journal Clin Psychol* 2009;65(5):467-87. doi: 10.1002/jclp.20593 [published Online First: 2009/03/21]
27. Layard R, Chisholm D, Patel V, et al. Mental illness and unhappiness. *CEP Discussion Papers, Centre for Economic Performance* 2013
28. Howell RT, Kern ML, Lyubomirsky S. Health benefits: Meta-analytically determining the impact of well-being on objective health outcomes. *Health Psych Rev* 2007;1(1):83-136. doi: 10.1080/17437190701492486
29. Pressman SD, Cohen S. Does positive affect influence health? *Psychol Bull* 2005;131(6):925-71.
30. MHASEF Research Team. Mental Health and Addictions System Performance in Ontario: A Baseline Scorecard. Toronto, ON: Institute for Clinical Evaluative Sciences, 2018.

1  
2  
3  
4  
5  
6  
7  
8  
9  
10  
11  
12  
13  
14  
15  
16  
17  
18  
19  
20  
21  
22  
23  
24  
25  
26  
27  
28  
29  
30  
31  
32  
33  
34  
35  
36  
37  
38  
39  
40  
41  
42  
43  
44  
45  
46  
47  
48  
49  
50  
51  
52  
53  
54  
55  
56  
57  
58  
59  
60

For peer review only



1  
2  
3  
4  
5  
6  
7  
8  
9  
10  
11  
12  
13  
14  
15  
16  
17  
18  
19  
20  
21  
22  
23  
24  
25  
26  
27  
28  
29  
30  
31  
32  
33  
34  
35  
36  
37  
38  
39  
40  
41  
42  
43  
44  
45  
46  
47  
48  
49  
50  
51  
52  
53  
54  
55  
56  
57  
58  
59  
60

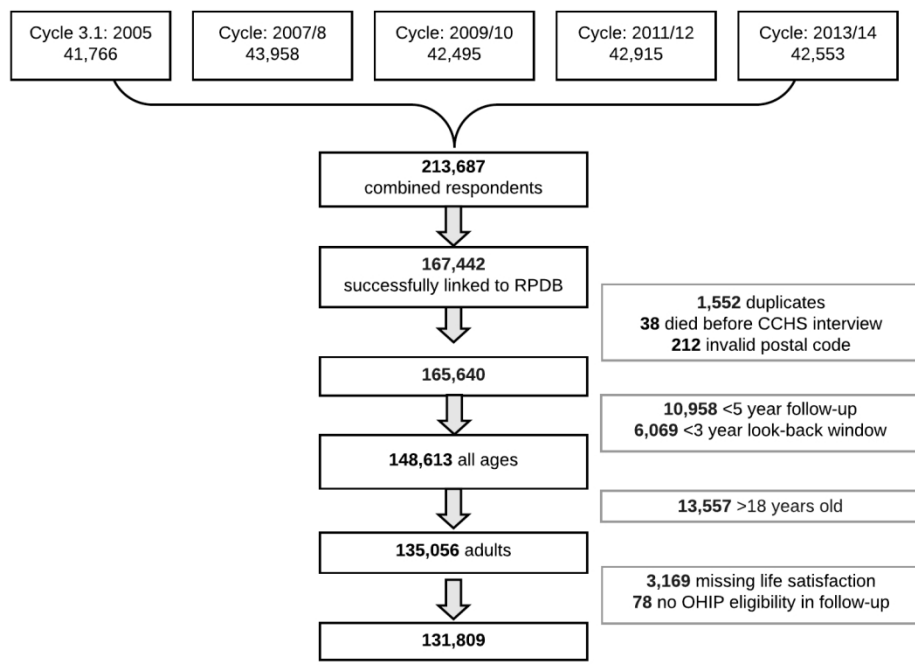

Figure 1. Flow chart of study population from pooled Ontario components of Statistics Canada’s Canadian Community Health Surveys (CCHS, 2005-2014) linked to health administrative data through the Registered Persons Database (RPDB).

**Supplementary Table 1:** Source databases and corresponding ICD-9 or -10 codes defining mental health visits in each respective study setting.

| <b>Hospitalization/emergency department visit for any mental health condition</b>                |                                                                                                                                                                                                                                                                                                                                                                                                                                                                                                                                                                                                                                                                                                                                       |
|--------------------------------------------------------------------------------------------------|---------------------------------------------------------------------------------------------------------------------------------------------------------------------------------------------------------------------------------------------------------------------------------------------------------------------------------------------------------------------------------------------------------------------------------------------------------------------------------------------------------------------------------------------------------------------------------------------------------------------------------------------------------------------------------------------------------------------------------------|
| ICD-9 codes<br>(OMHRS - DSM IV)                                                                  | Any OMHRS (including missing, excluding 290.x, 294.x in primary diagnosis)<br>Exclude if Dxcode missing and provisional=2                                                                                                                                                                                                                                                                                                                                                                                                                                                                                                                                                                                                             |
| ICD-10 codes<br>(NACRS/DAD)                                                                      | DX10CODE1= F09-F99<br>DX10CODE2-25 = X60-X84, Y10-Y19, Y28 when DX10CODE1 ne F06-F99                                                                                                                                                                                                                                                                                                                                                                                                                                                                                                                                                                                                                                                  |
| <b>Outpatient (primary care/psychiatrist/pediatrician) visit for any mental health condition</b> |                                                                                                                                                                                                                                                                                                                                                                                                                                                                                                                                                                                                                                                                                                                                       |
| ICD-9 codes<br>(OHIP)                                                                            | 291-293, 295-319<br><br>Psychiatrist [SPEC=19] and outpatient (LOCATION: O, L, H) and non-lab service [substr(FEECODE,1,1) ne 'G'], <i>OR</i><br><br>FP/GP [SPEC=00] and MHA diagnosis code [DXCODE] and outpatient (LOCATION: O, L, H) and non-lab service [substr(FEECODE,1,1) ne 'G'], <i>OR</i><br><br>Paediatrician [SPEC=26] and undefined location (LOCATION =U) and MHA diagnosis code [DXCODE] and fee code (FEECODE=K122 or K123 or K704). Paediatrician fee code description:<br>K122 Developmental and/or behavioural care - individual developmental and/or behavioural care<br>K123 Developmental and/or behavioural care - family developmental and/or behavioural care<br>K704 Paediatric out-patient case conference |

Abbreviations: ICD International Classification of Disease; DSM Diagnostic and Statistical Manual of Mental Disorders; OMHRS Ontario Mental Health Reporting System; NACRS National Ambulatory Care Reporting System; DAD Distract Abstract Database; OHIP Ontario Health Insurance Plan; FP Family physician; GP General practitioner; Dxcode Diagnosis code

**Supplementary Table 2:** Fully adjusted rate ratios<sup>a,b</sup> and 95% confidence intervals for counts of (i) hospitalization or emergency department visits, or (ii) outpatient visits for any mental health condition, excluding participants had any mental health visit three years prior to or 1 year following interview\_(N=84,528). Source: Canadian Community Health Survey, Ontario, Canada.

| <b>Hospital or emergency department visit</b> |                    |
|-----------------------------------------------|--------------------|
| <i>Very satisfied or satisfied</i>            | Ref.               |
| <i>Neither</i>                                | 1.51 (0.74, 3.08)  |
| <i>Dissatisfied</i>                           | 2.23 (1.27, 3.89)  |
| <i>Very dissatisfied</i>                      | 3.97 (0.40, 40.54) |
| <b>Outpatient visit</b>                       |                    |
| <i>Very satisfied or satisfied</i>            | Ref.               |
| <i>Neither</i>                                | 1.19 (0.97, 1.46)  |
| <i>Dissatisfied</i>                           | 1.72 (1.06, 2.79)  |
| <i>Very dissatisfied</i>                      | 2.15 (1.21, 3.83)  |

<sup>a</sup> Multivariable adjusted rate ratios from Poisson regressions (with balanced repeated replication to produce 95% confidence intervals) for a count of the number of (i) hospitalization or emergency department visits, or (ii) outpatient visits for any mental health condition, per person-days of follow-up, within 5 years following Canadian Community Health Survey interview..

<sup>b</sup> Fully adjusted model includes age, sex, survey cycle, immigrant status, household income, having had any mental health visit In the three years prior to survey interview, smoking status, alcohol consumption, physical activity level, and body mass index.

**Supplementary Table 3:** Fully adjusted rate ratios<sup>a,b</sup> and 95% confidence intervals for counts of (i) hospitalization or emergency department visits, or (ii) outpatient visits for any mental health condition, excluding participants who lost OHIP eligibility for more than 1 consecutive year (N=125,304). Source: Canadian Community Health Survey, Ontario, Canada.

| <b>Hospital or emergency department visit</b> |                   |
|-----------------------------------------------|-------------------|
| <i>Very satisfied or satisfied</i>            | Ref.              |
| <i>Neither</i>                                | 1.90 (1.30, 2.78) |
| <i>Dissatisfied</i>                           | 2.23 (1.70, 2.92) |
| <i>Very dissatisfied</i>                      | 3.82 (2.16, 6.73) |
| <b>Outpatient visit</b>                       |                   |
| <i>Very satisfied or satisfied</i>            | Ref.              |
| <i>Neither</i>                                | 1.64 (1.44, 1.86) |
| <i>Dissatisfied</i>                           | 2.22 (1.89, 2.61) |
| <i>Very dissatisfied</i>                      | 1.85 (1.42, 2.41) |

<sup>a</sup> Multivariable adjusted rate ratios from Poisson regressions (with balanced repeated replication to produce 95% confidence intervals) for a count of the number of (i) hospitalization or emergency department visits, or (ii) outpatient visits for any mental health condition, per person-days of follow-up, within 5 years following Canadian Community Health Survey interview..

<sup>b</sup> Fully adjusted model includes age, sex, survey cycle, immigrant status, household income, having had any mental health visit in the three years prior to survey interview, smoking status, alcohol consumption, physical activity level, and body mass index.

**Supplementary Table 4:** Fully adjusted rate ratios and 95% confidence intervals for counts of (i) hospitalization or emergency department visits, or (ii) outpatient visits for any mental health condition, with missing income observations categorized as a separate category (N=131,809). Source: pooled participants surveyed from 2005 to 2014 (N=131,809), Canadian Community Health Survey, Ontario, Canada.

| <b>Hospital or emergency department visit</b> |                   |
|-----------------------------------------------|-------------------|
| <i>Very satisfied or satisfied</i>            | Ref.              |
| <i>Neither</i>                                | 1.87 (1.29, 2.72) |
| <i>Dissatisfied</i>                           | 2.28 (1.77, 2.94) |
| <i>Very dissatisfied</i>                      | 3.67 (2.12, 6.38) |
| <b>Outpatient visit</b>                       |                   |
| <i>Very satisfied or satisfied</i>            | Ref.              |
| <i>Neither</i>                                | 1.61 (1.42, 1.83) |
| <i>Dissatisfied</i>                           | 2.19 (1.87, 2.56) |
| <i>Very dissatisfied</i>                      | 1.82 (1.41, 2.35) |

<sup>a</sup> Multivariable adjusted rate ratios from Poisson regressions (with balanced repeated replication to produce 95% confidence intervals) for a count of the number of (i) hospitalization or emergency department visits, or (ii) outpatient visits for any mental health condition, per person-days of follow-up, within 5 years following Canadian Community Health Survey interview..

<sup>b</sup> Fully adjusted model includes age, sex, survey cycle, immigrant status, household income, having had any mental health visit in the three years prior to survey interview, smoking status, alcohol consumption, physical activity level, and body mass index.

**STROBE 2007 (v4) Statement—Checklist of items that should be included in reports of *cohort studies***

| Section/Topic                | Item # | Recommendation                                                                                                                                                                       | Reported on page # |
|------------------------------|--------|--------------------------------------------------------------------------------------------------------------------------------------------------------------------------------------|--------------------|
| <b>Title and abstract</b>    | 1      | (a) Indicate the study's design with a commonly used term in the title or the abstract                                                                                               | 1                  |
|                              |        | (b) Provide in the abstract an informative and balanced summary of what was done and what was found                                                                                  | 2                  |
| <b>Introduction</b>          |        |                                                                                                                                                                                      |                    |
| Background/rationale         | 2      | Explain the scientific background and rationale for the investigation being reported                                                                                                 | 4                  |
| Objectives                   | 3      | State specific objectives, including any prespecified hypotheses                                                                                                                     | 4                  |
| <b>Methods</b>               |        |                                                                                                                                                                                      |                    |
| Study design                 | 4      | Present key elements of study design early in the paper                                                                                                                              | 5                  |
| Setting                      | 5      | Describe the setting, locations, and relevant dates, including periods of recruitment, exposure, follow-up, and data collection                                                      | 5                  |
| Participants                 | 6      | (a) Give the eligibility criteria, and the sources and methods of selection of participants. Describe methods of follow-up                                                           | 5-6                |
|                              |        | (b) For matched studies, give matching criteria and number of exposed and unexposed                                                                                                  | NA                 |
| Variables                    | 7      | Clearly define all outcomes, exposures, predictors, potential confounders, and effect modifiers. Give diagnostic criteria, if applicable                                             | 6-7                |
| Data sources/<br>measurement | 8*     | For each variable of interest, give sources of data and details of methods of assessment (measurement). Describe comparability of assessment methods if there is more than one group | 6-7                |
| Bias                         | 9      | Describe any efforts to address potential sources of bias                                                                                                                            | 8                  |
| Study size                   | 10     | Explain how the study size was arrived at                                                                                                                                            | 6                  |
| Quantitative variables       | 11     | Explain how quantitative variables were handled in the analyses. If applicable, describe which groupings were chosen and why                                                         | 6-8                |
| Statistical methods          | 12     | (a) Describe all statistical methods, including those used to control for confounding                                                                                                | 7-8                |
|                              |        | (b) Describe any methods used to examine subgroups and interactions                                                                                                                  | 7-8                |
|                              |        | (c) Explain how missing data were addressed                                                                                                                                          | 8                  |
|                              |        | (d) If applicable, explain how loss to follow-up was addressed                                                                                                                       | 7, death (offset)  |
|                              |        | (e) Describe any sensitivity analyses                                                                                                                                                | 8                  |
| <b>Results</b>               |        |                                                                                                                                                                                      |                    |

|                          |     |                                                                                                                                                                                                              |                     |
|--------------------------|-----|--------------------------------------------------------------------------------------------------------------------------------------------------------------------------------------------------------------|---------------------|
| Participants             | 13* | (a) Report numbers of individuals at each stage of study—eg numbers potentially eligible, examined for eligibility, confirmed eligible, included in the study, completing follow-up, and analysed            | 6                   |
|                          |     | (b) Give reasons for non-participation at each stage                                                                                                                                                         | 6                   |
|                          |     | (c) Consider use of a flow diagram                                                                                                                                                                           | Figure 1            |
| Descriptive data         | 14* | (a) Give characteristics of study participants (eg demographic, clinical, social) and information on exposures and potential confounders                                                                     | 9 (Table 1)         |
|                          |     | (b) Indicate number of participants with missing data for each variable of interest                                                                                                                          | 8 (max reported)    |
|                          |     | (c) Summarise follow-up time (eg, average and total amount)                                                                                                                                                  | 5 (5y, 3y lookback) |
| Outcome data             | 15* | Report numbers of outcome events or summary measures over time                                                                                                                                               | 9 (Table 1)         |
| Main results             | 16  | (a) Give unadjusted estimates and, if applicable, confounder-adjusted estimates and their precision (eg, 95% confidence interval). Make clear which confounders were adjusted for and why they were included | 11, 12 (Tables 2,3) |
|                          |     | (b) Report category boundaries when continuous variables were categorized                                                                                                                                    | NA                  |
|                          |     | (c) If relevant, consider translating estimates of relative risk into absolute risk for a meaningful time period                                                                                             | NA                  |
| Other analyses           | 17  | Report other analyses done—eg analyses of subgroups and interactions, and sensitivity analyses                                                                                                               | 11-14               |
| <b>Discussion</b>        |     |                                                                                                                                                                                                              |                     |
| Key results              | 18  | Summarise key results with reference to study objectives                                                                                                                                                     | 14                  |
| <b>Limitations</b>       |     |                                                                                                                                                                                                              |                     |
| Interpretation           | 20  | Give a cautious overall interpretation of results considering objectives, limitations, multiplicity of analyses, results from similar studies, and other relevant evidence                                   | 14-15               |
| Generalisability         | 21  | Discuss the generalisability (external validity) of the study results                                                                                                                                        | 16                  |
| <b>Other information</b> |     |                                                                                                                                                                                                              |                     |
| Funding                  | 22  | Give the source of funding and the role of the funders for the present study and, if applicable, for the original study on which the present article is based                                                | 18                  |

\*Give information separately for cases and controls in case-control studies and, if applicable, for exposed and unexposed groups in cohort and cross-sectional studies.

**Note:** An Explanation and Elaboration article discusses each checklist item and gives methodological background and published examples of transparent reporting. The STROBE checklist is best used in conjunction with this article (freely available on the Web sites of PLoS Medicine at <http://www.plosmedicine.org/>, Annals of Internal Medicine at <http://www.annals.org/>, and Epidemiology at <http://www.epidem.com/>). Information on the STROBE Initiative is available at [www.strobe-statement.org](http://www.strobe-statement.org).

# BMJ Open

## Is life satisfaction associated with future mental health service use? An observational population-based cohort study

|                                 |                                                                                                                                                                                                                                                                                                                                                                                                                                                                               |
|---------------------------------|-------------------------------------------------------------------------------------------------------------------------------------------------------------------------------------------------------------------------------------------------------------------------------------------------------------------------------------------------------------------------------------------------------------------------------------------------------------------------------|
| Journal:                        | <i>BMJ Open</i>                                                                                                                                                                                                                                                                                                                                                                                                                                                               |
| Manuscript ID                   | bmjopen-2021-050057.R1                                                                                                                                                                                                                                                                                                                                                                                                                                                        |
| Article Type:                   | Original research                                                                                                                                                                                                                                                                                                                                                                                                                                                             |
| Date Submitted by the Author:   | 04-Oct-2021                                                                                                                                                                                                                                                                                                                                                                                                                                                                   |
| Complete List of Authors:       | Michalski, Camilla; University of Toronto, Dalla Lana School of Public Health<br>Diemert, Lori M.; University of Toronto, Dalla Lana School of Public Health<br>Hurst, Mack; Institute for Clinical Evaluative Sciences; University of Toronto, Dalla Lana School of Public Health<br>Goel, Vivek; Dalla Lana School of Public Health; University of Toronto, Dalla Lana School of Public Health<br>Rosella, Laura; University of Toronto, Dalla Lana School of Public Health |
| <b>Primary Subject Heading</b>: | Mental health                                                                                                                                                                                                                                                                                                                                                                                                                                                                 |
| Secondary Subject Heading:      | Public health, Epidemiology                                                                                                                                                                                                                                                                                                                                                                                                                                                   |
| Keywords:                       | MENTAL HEALTH, PUBLIC HEALTH, EPIDEMIOLOGY                                                                                                                                                                                                                                                                                                                                                                                                                                    |
|                                 |                                                                                                                                                                                                                                                                                                                                                                                                                                                                               |

SCHOLARONE™  
Manuscripts



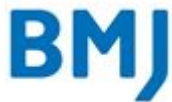

I, the Submitting Author has the right to grant and does grant on behalf of all authors of the Work (as defined in the below author licence), an exclusive licence and/or a non-exclusive licence for contributions from authors who are: i) UK Crown employees; ii) where BMJ has agreed a CC-BY licence shall apply, and/or iii) in accordance with the terms applicable for US Federal Government officers or employees acting as part of their official duties; on a worldwide, perpetual, irrevocable, royalty-free basis to BMJ Publishing Group Ltd ("BMJ") its licensees and where the relevant Journal is co-owned by BMJ to the co-owners of the Journal, to publish the Work in this journal and any other BMJ products and to exploit all rights, as set out in our [licence](#).

The Submitting Author accepts and understands that any supply made under these terms is made by BMJ to the Submitting Author unless you are acting as an employee on behalf of your employer or a postgraduate student of an affiliated institution which is paying any applicable article publishing charge ("APC") for Open Access articles. Where the Submitting Author wishes to make the Work available on an Open Access basis (and intends to pay the relevant APC), the terms of reuse of such Open Access shall be governed by a Creative Commons licence – details of these licences and which [Creative Commons](#) licence will apply to this Work are set out in our licence referred to above.

Other than as permitted in any relevant BMJ Author's Self Archiving Policies, I confirm this Work has not been accepted for publication elsewhere, is not being considered for publication elsewhere and does not duplicate material already published. I confirm all authors consent to publication of this Work and authorise the granting of this licence.

1  
2  
3  
4 **Is life satisfaction associated with future mental health service use? An**  
5 **observational population-based cohort study**  
6  
7

8  
9 Camilla A. Michalski MPH,<sup>a</sup> Lori M. Diemert MSc,<sup>b</sup> Mack Hurst MSc,<sup>c</sup>  
10  
11 Vivek Goel MD, MSc,<sup>d</sup> Laura C. Rosella\* PhD, MHSc<sup>e</sup>  
12  
13

14 <sup>a</sup> *Dalla Lana School of Public Health, University of Toronto, Toronto, Ontario, Canada.*

15  
16  
17 <sup>b</sup> *Dalla Lana School of Public Health, University of Toronto, Toronto, Ontario, Canada.*

18  
19  
20  
21 <sup>c</sup> *ICES, Toronto, Ontario, Canada; Dalla Lana School of Public Health, University of Toronto,*  
22 *Toronto, Ontario, Canada.*

23  
24  
25  
26  
27 <sup>d</sup> *Dalla Lana School of Public Health, University of Toronto, Toronto, Ontario, Canada; Institute for*  
28 *Health Policy Management and Evaluation, University of Toronto, Toronto, Ontario, Canada; ICES,*  
29 *Toronto, Ontario, Canada.*

30  
31  
32  
33  
34  
35  
36  
37 <sup>e</sup> *Division of Epidemiology, Dalla Lana School of Public Health, University of Toronto, Toronto,*  
38 *Ontario, Canada; Institute for Health Policy Management and Evaluation, University of Toronto,*  
39 *Toronto, Ontario, Canada; ICES, Toronto, Ontario, Canada.; Institute for Better Health, Trillium*  
40 *Health Partners, Mississauga, Ontario, Canada*

41  
42  
43  
44  
45  
46  
47  
48  
49  
50  
51  
52  
53  
54  
55  
56  
57  
58  
59  
60  

\*Corresponding Author: Laura C. Rosella, [laura.rosella@utoronto.ca](mailto:laura.rosella@utoronto.ca)  
Health Sciences Building, 155 College Street, Suite 661, Toronto, ON M5T 3M7

**Main body word count:** 3,584 (from Introduction to Conclusion, excluding tables and figures)

**ABSTRACT**

**Objective:** To investigate the prospective association between life satisfaction and future mental health service use in: (i) hospital/emergency department (ED), and (ii) outpatient settings.

**Design and setting:** Population-based cohort study of adults from Ontario, Canada. Baseline data were captured through pooled cycles of the Canadian Community Health Survey (CCHS 2005-2014) and linked to health administrative data for up to five years of follow-up.

**Participants:** 131,809 Ontarians aged 18 years and older.

**Main outcome measure:** The number of mental health-related visits in (1) hospitals/emergency department and (2) outpatient settings within five-years of follow-up.

**Results:** Poisson regression models were used to estimate rate ratios in each setting, adjusting for sociodemographic measures, history of mental health-related visits, and health behaviours. In the hospital/emergency setting, compared to those most satisfied with life, those with the poorest satisfaction exhibited a rate ratio of 3.71 (95% confidence interval (CI): 2.14, 6.45) for future visits. In the outpatient setting, this same comparison group exhibited a rate ratio of 1.83 (95% CI: 1.42, 2.37). When the joint effects of household income were considered, compared to the highest income and most satisfied individuals, the least satisfied and lowest income individuals exhibited the highest rate ratio in the hospital/emergency setting at 11.25 (95% CI: 5.32, 23.80) whereas in the outpatient setting, the least satisfied and highest income individuals exhibited the highest rate ratio at 3.33 (95% CI: 1.65, 6.70).

**Conclusion:** The findings suggest that life satisfaction is a risk factor for future mental health visits. This study contributes to an evidence base connecting positive wellbeing with health system outcomes.

**Abstract word count: 259**

**Keywords:** mental health; health service use; epidemiology; public health; life satisfaction; wellbeing

## ARTICLE SUMMARY

### Strengths and Limitations

- This large provincially representative study links multiple cycles of the Canadian Community Health Survey with health administrative databases to evaluate the association between life satisfaction and mental health service use in two care settings.
- Insight into participants' history of mental health-related visits prior to survey interview allowed for more robust analyses that considered baseline mental health status and therefore decreased concern for reverse causation.
- Mental health-related visits with types of care providers that are not captured by the administrative databases could not be accounted for during follow-up, which could confound the reported association.
- Life satisfaction and health behaviours were only measured once at baseline, increasing the potential for misclassification bias.

## INTRODUCTION

Mental and substance use disorders account for approximately 7.4% of all disability-adjusted life-years worldwide, and in Canada, 1 in 5 people live with a mental health problem or illness.<sup>1 2</sup> Mental illness is often accompanied by workforce participation barriers, excess comorbidity, high health care utilization, and shortened life expectancy.<sup>3 4</sup> In Canada's most populous province of Ontario, the burden of mental illness and addictions (in terms of health-adjusted life years) is estimated to exceed 1.5 times the burden of all cancers, and seven times the burden of all infectious diseases.<sup>5</sup>

Further, the demand for mental health services is increasing. In Ontario specifically, there are common delays in wait times for counselling and therapy that are often too long for effective care and result in unmet health needs.<sup>6 7</sup> In a cross-sectional study examining self-reported mental health service use among Ontario residents, service use increased from 7.2% in 2003–2005 to 12.8% in 2011–2014.<sup>8</sup> Among the subgroup reporting a past-year major depressive episode, the proportion of individuals not using mental health services was 48.8% in 2002, and decreased to 35.6% in 2012.<sup>8</sup> This increase in demand for health services can effectively strain health system capacity, reducing the quality of services received. A study conducted in south-eastern Ontario found that only 30% of clients seeking community-based care received an intensity of service that matched their psychosocial needs.<sup>9</sup> The majority (80%) of Canadians seek care from their primary care physician, of whom only 23% report feeling prepared to care for patients with severe mental health problems.<sup>10</sup> Evidently, there exists a comprehensive demand for accessible mental health care, which is deepening with time.

Epidemiologic research has historically been overwhelmingly oriented towards health deficits and risk factors, but in recent years, the idea that promoting positive aspects of health can have a widespread impact on health system outcomes has gained traction. A growing body of evidence points to a variety of positive social, psychological, and environmental factors that influence health and wellbeing outcomes to a comparable degree as what is observed in the larger risk factor-focused body

1  
2  
3  
4 of research.<sup>11</sup> With regards to mental health, a promotion and protection framework describes a dual  
5  
6 continuum wherein mental health is conceptualized as more than just the absence of illness, extending  
7  
8 beyond deficits, beyond neutrality, and into a positive spectrum of wellbeing.<sup>12</sup> The World Health  
9  
10 Organization adopts this framework in its description of mental health as a state of well-being in which  
11  
12 an individual recognizes their abilities and is able to work productively, cope with life stressors, and  
13  
14 make contributions to their community.<sup>13</sup> In other words, mental illness and positive mental wellbeing  
15  
16 are two distinct but related concepts: people can have a mental illness yet cope well with it and be  
17  
18 happily satisfied with their life, whilst others can be free from mental illness yet exhibit high levels of  
19  
20 mental dysfunction and dissatisfaction with their life.<sup>12 14 15</sup> Critical to this framework lies the  
21  
22 hypothesis that that gains in positive mental wellbeing can decrease the risk for future mental illness  
23  
24 and health deficits.<sup>14</sup> Effectively, this premise extends understandings of health determinants and  
25  
26 extends opportunities to integrate promotional and wellbeing-oriented supports. Expanding  
27  
28 understandings of not only negative but also positive factors associated with health care utilization  
29  
30 encourages the development of innovative and sustainable approaches to improving health system  
31  
32 capacity, which is especially pertinent under the context of a growing demand for mental health care.  
33  
34  
35  
36  
37

38  
39 Previous studies have shown associations between positive mental wellbeing and a variety of  
40  
41 health outcomes.<sup>14 16-18</sup> One wellbeing measure in particular, life satisfaction, has been shown to be  
42  
43 associated with multiple health outcomes, such as health behaviours, chronic disease, death,  
44  
45 preventable hospitalizations, general health care use, and mental health symptom development.<sup>19-23</sup> Life  
46  
47 satisfaction is concerned with a subjective global evaluation of one's life, and previous studies support  
48  
49 this measure as encompassing mental, physical, and social facets of wellbeing.<sup>22 24 25</sup> However, to the  
50  
51 authors' knowledge, no studies have examined prospective and population-wide associations with  
52  
53 subsequent mental health service use in Ontario. Using a large, representative population-based cohort,  
54  
55  
56  
57  
58  
59  
60

Life satisfaction and mental health service use

we aim to investigate the prospective association between life satisfaction and future mental health service use in: (i) hospital/emergency department (ED), and (ii) outpatient settings.

## METHODS

### *Study population*

Data from five pooled cycles of Statistics Canada's Canadian Community Health Survey (CCHS, cycles 2005, 2007/08, 2009/10, 2011/12, 2013/14) were linked with population-based health administrative databases in Ontario, Canada. Datasets were linked using unique encoded identifiers and analysed at ICES, which is an independent, non-profit research institute whose legal status under Ontario's health information privacy law allows it to collect and analyse health care and demographic data, without consent, for health system evaluation and improvement.

Developed and administered by Statistics Canada, the CCHS is a cross-sectional survey that uses a multi-stage sample allocation strategy to gather data concerning health determinants, use, and outcomes across Canada. Response rates range from 66% to 79%, and the sample is representative of 98% of the Canadian population aged 12 years or older living in private dwellings. Statistics Canada asks CCHS participants for consent to share their survey responses with provincial ministries of health and link responses to administrative databases. Detailed survey methodology is available elsewhere.<sup>26</sup>

Respondents from Ontario who consented to share their survey data were linked to the Registered Persons Database (RPDB), which contains information on persons registered under the Ontario Health Insurance Plan (OHIP). Canada has a universal health care system controlled by each province or territory, and in Ontario all permanent residents are covered by a single-payer insurance system known as OHIP where all related health care encounters are recorded in health administrative

1  
2  
3  
4 databases. Using the CCHS interview as the index date, each participant had up to five years of follow-  
5  
6 up and a three-year lookback window in the administrative data. Mental health care utilization was  
7  
8 documented in two settings: hospital or ED visits, and outpatient visits.  
9

10  
11 Pooling the Ontario component of the five selected CCHS cycles (N=213,687), 167,442  
12 participants were successfully linked to the RPDB. After removing duplicate records, those with  
13  
14 invalid death dates or postal codes, those under 18 years of age, those missing life satisfaction  
15  
16 measures, and those who were never eligible for OHIP during follow-up, 131,809 respondents were  
17  
18 included (Figure 1).  
19  
20  
21  
22  
23  
24

## 25 **Measures**

26  
27  
28 *Exposure:* The focal exposure was a single-item measure of life satisfaction. All CCHS  
29 respondents were prompted with the question: *How satisfied are you with your life in general?* For  
30  
31 cycles 2005 and 2007/08, CCHS respondents were directly given five response options: *very satisfied*,  
32  
33 *satisfied*, *neither satisfied nor dissatisfied*, *dissatisfied*, or *very dissatisfied*. For cycles 2009/10,  
34  
35 2011/12, 2013/14, the response option was an 11-point scale (from 0 labelled *very dissatisfied* to 10  
36  
37 labelled *very satisfied*), which was then converted to the same 5-point scale by Statistics Canada. For  
38  
39 the purposes of this study, *very satisfied* and *satisfied* response levels were collapsed due to perceived  
40  
41 similarity with respect to mental health service use outcomes. As mentioned, this single-item measure  
42  
43 has been shown to be reliable and valid, as well as a moderately stable measure over time.<sup>27-29</sup>  
44  
45 Compared to multi-item measures, this single-item measure has been shown to capture information  
46  
47 very similarly to its multidimensional counterparts.<sup>30</sup>  
48  
49  
50  
51  
52  
53

54 *Outcome:* The primary outcome was a count of the number of mental health visits in each of the  
55  
56 two settings in the five years following CCHS interview date. Secondary analyses were conducted to  
57  
58  
59  
60



Life satisfaction and mental health service use

1  
2  
3  
4 examine binary measures of having ever had a mental health visit in the five years of follow-up.

5  
6 Hospital admissions were identified from the Canadian Institute for Health Information Discharge  
7  
8 Abstract Database (CIHI-DAD) (2002–2019) and the Ontario Mental Health Reporting System  
9  
10 (OMHRS) (2005–2019). ED visits were obtained through the National Ambulatory Care Reporting  
11  
12 System (NACRS) (2002–2019). Outpatient visits (defined as a visit to a primary care physician for any  
13  
14 mental health condition or to a psychiatrist for any reason) were determined from the OHIP billings  
15  
16 database between 2002 and 2019 (Supplementary Table 1A).  
17  
18  
19  
20

21 *Covariates:* Having had any prior mental health-related service use (in either of the two defined  
22  
23 settings) was estimated from administrative data captured in the three years before the baseline  
24  
25 interview for each participant. Age and sex were collected from the RPDB. Unfortunately, a measure  
26  
27 for gender identity was not available. All other covariates were captured in the CCHS and included  
28  
29 survey interview year, immigrant status, household income, smoking behaviour, alcohol consumption,  
30  
31 physical activity level, and body mass index (BMI) (see Supplementary Table 1B for added detail on  
32  
33 CCHS-derived covariate categorizations). These variables were chosen as they have been shown to be  
34  
35 important confounders in the relationship between life satisfaction and health system and population  
36  
37 health outcomes in previous studies.<sup>19-21</sup>  
38  
39  
40  
41  
42

### 43 ***Statistical Analyses***

44  
45  
46 The distributions of mental health care service use and selected covariates were estimated  
47  
48 according to the four defined categorizations of life satisfaction. Poisson regression models were used  
49  
50 to estimate rate ratios of mental health visits in hospital/ED or outpatient settings with a person-days  
51  
52 offset. In addition, we estimated risk ratios for the binary outcome of ever/never having had a  
53  
54 subsequent visit in each setting using modified Poisson regression models. Estimates from four  
55  
56  
57  
58  
59  
60

1  
2  
3  
4 sequentially adjusted models were reported to transparently demonstrate the impact of the various  
5  
6 adjustments: (i) unadjusted; (ii) age-, sex-, and survey cycle-adjusted; (iii) minimally adjusted; and (iv)  
7  
8 fully adjusted. Minimally adjusted models included age, sex, survey cycle, immigrant status, and  
9  
10 household income quintile. Fully adjusted models additionally adjusted for having had any mental  
11  
12 health visit three years prior to the baseline interview, smoking behaviour, alcohol consumption,  
13  
14 physical activity level, and BMI. To examine whether the association between life satisfaction and  
15  
16 counts of mental health visits varied by socioeconomic status, fully adjusted joint-effects models were  
17  
18 conducted which included a 12-category joint-effects variable combining life satisfaction with a  
19  
20 collapsed measure of household income (where *low income*=quintile 1, *mid income*=quintiles 2 and 3,  
21  
22 and *high income*=quintiles 4 and 5).  
23  
24  
25  
26  
27

28 Median values were imputed for all missing observations. Income had the highest proportion of  
29  
30 missing observations at 6.3% and we conducted a separate sensitivity analysis coding missing  
31  
32 observations as a separate category. To decrease concern for reverse causation and attempt to capture  
33  
34 any baseline mental illness that may have influenced life satisfaction, we conducted two sensitivity  
35  
36 analyses by estimating models wherein (i) participants with any documented mental health visit within  
37  
38 their three-year lookback window or one year following their interview day were excluded and (ii) self-  
39  
40 rated mental health was additionally adjusted for in the original fully adjusted models. Another  
41  
42 sensitivity analysis excluded participants who lost OHIP eligibility for one year or more, and the last  
43  
44 sensitivity analysis stratified by age group (18-59 years versus 60 years and over) to examine whether  
45  
46 life stage substantially impacted point estimates.  
47  
48  
49  
50  
51

52 Pooled survey weights were used to adjust for the complex survey design of the CCHS and  
53  
54 provide provincially representative estimates. Bootstrap weights were applied using balanced repeated  
55  
56 replication to estimate variance.<sup>31</sup> Statistical analyses were performed in 2020 using SAS Enterprise  
57  
58  
59  
60

Life satisfaction and mental health service use

version 7.1 and Stata version 15.1.

### ***Patient and Public Involvement***

No patients involved.

### ***Ethics Approval***

The study design received ethics approval by the Research Ethics Board at the University of Toronto (protocol #39444).

## **RESULTS**

Of the study cohort, 90.9% reported being very satisfied or satisfied with life, 5.8% reported being neither satisfied nor dissatisfied, 2.7% reported being dissatisfied, and 0.6% reported being very dissatisfied. Compared to those most satisfied with life, those who reported being very dissatisfied with life were older (with a mean age of 51.8 years compared to 45.7), more likely to be in the lowest household income quintile (48.8% versus 15.3%), current smokers (41.7% versus 18.6%), non-drinkers (35.3% versus 19.9%), physically inactive (70.2% versus 46.8%), underweight or very obese, and have had a mental health visit in both the lookback and follow-up windows (Table 1). The mean follow-up time (censored by death date) was 4.93 years.

Restricting to those that had at least one hospital/ED visit during follow-up (N=5,507), the mean number of hospital/ED visits was 2.0 (95% CI: 1.8, 2.1). Stratifying this group by level of life satisfaction, the most satisfied group exhibited the lowest mean at 1.8 (95% CI: 1.7, 1.9), which increased per lower level of satisfaction to reach a mean of 3.4 (95% CI: 1.9, 4.9) hospital/ED visits among those most dissatisfied. Further restricting to those with repeat hospital/ED visits (i.e., >1 visit)

during follow-up (N=1,757), the mean number of visits was 4.0 (95% CI: 3.6, 4.3) and estimates followed the same sequential trend when stratified by life satisfaction.

Among those that had at least one outpatient visit during follow-up (N=49,450), the mean number of outpatient visits was 7.5 (95% CI: 7.2, 7.8). The most satisfied group had the lowest mean at 6.8 (95% CI: 6.5, 7.1) and the dissatisfied group had the highest mean at 15.1 (95% CI: 12.9, 17.4) visits, followed by the very dissatisfied group at 12.8 (9.5, 16.1) outpatient visits. Further restricting to those with repeat outpatient visits (N=31,311), the mean number of visits was 11.2 (95% CI: 10.8, 11.7). Again, the dissatisfied group had the highest mean number of visits at 19.0 (95% CI: 16.1, 21.9), following the same sequential trend when stratified by life satisfaction.

**Table 1:** Proportion (%) and mean<sup>a</sup> characteristics for the study sample (N=131,809).

|                            | Life Satisfaction      |                          |                      |                           |                              |
|----------------------------|------------------------|--------------------------|----------------------|---------------------------|------------------------------|
|                            | Overall<br>(N=131,809) | Satisfied<br>(N=119,543) | Neither<br>(N=7,541) | Dissatisfied<br>(N=3,745) | Very dissatisfied<br>(N=980) |
| <b>Mean<sup>a</sup></b>    |                        |                          |                      |                           |                              |
| Age                        | 46.0                   | 45.7                     | 48.4                 | 48.9                      | 51.8                         |
| Total # hospital/ED visits | 0.07                   | 0.06                     | 0.16                 | 0.28                      | 0.53                         |
| Total # outpatient visits  | 2.9                    | 2.5                      | 5.4                  | 9.4                       | 8.6                          |
| <b>%<sup>a</sup></b>       |                        |                          |                      |                           |                              |
| <b>Sex</b>                 |                        |                          |                      |                           |                              |
| Female                     | 51.1                   | 51.0                     | 54.0                 | 50.1                      | 51.7                         |
| Male                       | 48.9                   | 49.0                     | 46.0                 | 49.3                      | 48.3                         |
| <b>CCHS Cycle</b>          |                        |                          |                      |                           |                              |
| 2005/06                    | 16.2                   | 16.2                     | 16.0                 | 17.1                      | 13.4                         |
| 2007/09                    | 22.3                   | 22.1                     | 23.8                 | 24.1                      | 21.0                         |
| 2009/10                    | 23.0                   | 23.0                     | 23.4                 | 22.4                      | 20.3                         |
| 2011/12                    | 23.3                   | 23.5                     | 21.3                 | 22.9                      | 25.1                         |
| 2013/14                    | 15.1                   | 15.1                     | 15.5                 | 13.6                      | 20.2                         |
| <b>Immigrant</b>           |                        |                          |                      |                           |                              |
| No                         | 67.3                   | 68.1                     | 56.4                 | 64.7                      | 69.3                         |
| Yes                        | 32.7                   | 31.9                     | 43.6                 | 35.3                      | 30.7                         |
| <b>Household income</b>    |                        |                          |                      |                           |                              |
| Q1 (Lowest)                | 16.9                   | 15.3                     | 29.4                 | 40.0                      | 48.8                         |
| Q2                         | 17.4                   | 17.0                     | 22.1                 | 19.7                      | 15.9                         |
| Q3                         | 26.0                   | 26.1                     | 26.8                 | 22.3                      | 17.9                         |
| Q4                         | 19.2                   | 20.0                     | 12.4                 | 9.3                       | 8.1                          |

## Life satisfaction and mental health service use

Michalski I.

|                                                                  |             |      |      |      |      |
|------------------------------------------------------------------|-------------|------|------|------|------|
| Q5 (Highest)                                                     | <b>20.5</b> | 21.6 | 9.3  | 8.7  | 9.3  |
| <b>Smoking status</b>                                            |             |      |      |      |      |
| Non-smoker                                                       | <b>58.3</b> | 59.3 | 51.3 | 44.0 | 34.9 |
| Former                                                           | <b>21.9</b> | 22.1 | 19.4 | 20.9 | 21.5 |
| Current                                                          | <b>19.8</b> | 18.6 | 29.4 | 35.1 | 41.7 |
| <b>Alcohol consumption</b>                                       |             |      |      |      |      |
| No past-year                                                     | <b>20.6</b> | 19.9 | 27.0 | 28.1 | 35.3 |
| Occasional                                                       | <b>16.3</b> | 15.8 | 21.3 | 22.7 | 21.5 |
| Regular                                                          | <b>28.3</b> | 28.8 | 24.1 | 21.4 | 17.0 |
| Regular & binge                                                  | <b>34.8</b> | 35.5 | 27.6 | 27.8 | 26.2 |
| <b>Physical activity<sup>b</sup></b>                             |             |      |      |      |      |
| Active                                                           | <b>26.4</b> | 27.4 | 17.1 | 15.9 | 15.9 |
| Moderate                                                         | <b>25.1</b> | 25.7 | 19.1 | 18.8 | 13.9 |
| Inactive                                                         | <b>48.5</b> | 46.8 | 63.8 | 65.3 | 70.2 |
| <b>Body mass index</b>                                           |             |      |      |      |      |
| Underweight (<18.5)                                              | <b>2.6</b>  | 2.4  | 3.8  | 3.8  | 6.5  |
| Normal (18.5-24.9)                                               | <b>43.7</b> | 44.3 | 39.4 | 35.4 | 33.7 |
| Overweight (25-29.9)                                             | <b>36.6</b> | 36.7 | 36.6 | 34.7 | 35.6 |
| Mod obese (30-34.9)                                              | <b>12.1</b> | 11.9 | 12.9 | 15.3 | 13.0 |
| Very obese (≥35)                                                 | <b>5.0</b>  | 4.7  | 7.3  | 10.8 | 11.3 |
| <b>Hospital or emergency department visit (5-year follow-up)</b> |             |      |      |      |      |
| No                                                               | <b>96.3</b> | 96.8 | 93.3 | 88.4 | 84.3 |
| Yes                                                              | <b>3.7</b>  | 3.2  | 6.7  | 11.6 | 15.7 |
| <b>Outpatient visit (5-year follow-up)</b>                       |             |      |      |      |      |
| No                                                               | <b>62.1</b> | 63.8 | 50.0 | 37.8 | 32.6 |
| Yes                                                              | <b>37.9</b> | 36.2 | 50.0 | 62.2 | 67.4 |
| <b>Any MH visit (3-year lookback)</b>                            |             |      |      |      |      |
| No                                                               | <b>69.9</b> | 71.6 | 56.7 | 44.8 | 41.7 |
| Yes                                                              | <b>30.1</b> | 28.4 | 43.3 | 55.2 | 58.3 |

Source: pooled participants of the Canadian Community Health Survey surveyed from 2005 to 2014, linked to the Registered Persons Database, Canadian Institute for Health Information Discharge Abstract Database, the Ontario Mental Health Reporting System, the National Ambulatory Care Reporting System, and the Ontario Health Insurance Plan billings databases.

<sup>a</sup> Survey sampling weights were used to produce population estimates.

Examining the association with future mental health-related hospital/ED visits, a dose-response was observed for decreasing levels of life satisfaction. Individuals most dissatisfied with their lives exhibited the highest rate (Table 2) and risk (Table 3) ratios compared to those most satisfied with their lives. This dose-response was less pronounced in the outpatient setting. Regarding our fully adjusted count outcome models, compared to those most satisfied with life, those who were most dissatisfied exhibited a fully adjusted rate ratio of 3.71 (95% CI: 2.14, 6.45) for future hospital/ED visits (Table 2).

In the outpatient setting, the same comparison group exhibited a fully adjusted rate ratio of 1.83 (95% CI: 1.42, 2.37). Covariate adjustments attenuated the magnitude of the life satisfaction effect (i.e., the unadjusted to fully adjusted rate ratios decreased from 9.48 to 3.71 in the hospital/ED setting and from 3.66 to 1.83 in the outpatient setting) (Table 2).

**Table 2:** Rate ratios<sup>a</sup> and 95% confidence intervals for counts of (i) hospitalization or emergency department visits, or (ii) outpatient visits for any mental health condition (N=131,809)

|                                               | Unadjusted         | Age, sex, cycle-adjusted | Minimally adjusted <sup>b</sup> | Fully adjusted <sup>c</sup> |
|-----------------------------------------------|--------------------|--------------------------|---------------------------------|-----------------------------|
| <b>Hospital or emergency department visit</b> |                    |                          |                                 |                             |
| <i>Very satisfied or satisfied</i>            | Ref.               | Ref.                     | Ref.                            | Ref.                        |
| <i>Neither</i>                                | 2.86 (1.92, 4.27)  | 3.08 (2.05, 4.62)        | 2.63 (1.77, 3.90)               | 1.89 (1.30, 2.73)           |
| <i>Dissatisfied</i>                           | 4.93 (3.91, 6.21)  | 5.40 (4.29, 6.80)        | 3.81 (2.96, 4.91)               | 2.29 (1.77, 2.96)           |
| <i>Very dissatisfied</i>                      | 9.48 (5.59, 16.08) | 10.98 (6.49, 18.60)      | 7.00 (4.09, 11.99)              | 3.71 (2.14, 6.45)           |
| <b>Outpatient visit</b>                       |                    |                          |                                 |                             |
| <i>Very satisfied or satisfied</i>            | Ref.               | Ref.                     | Ref.                            | Ref.                        |
| <i>Neither</i>                                | 2.24 (1.97, 2.56)  | 2.27 (1.99, 2.59)        | 2.24 (1.96, 2.56)               | 1.62 (1.42, 1.84)           |
| <i>Dissatisfied</i>                           | 3.92 (3.33, 4.62)  | 4.03 (3.42, 4.75)        | 3.67 (3.11, 4.33)               | 2.20 (1.88, 2.58)           |
| <i>Very dissatisfied</i>                      | 3.66 (2.85, 4.71)  | 3.84 (2.97, 4.95)        | 3.31 (2.56, 4.29)               | 1.83 (1.42, 2.37)           |

Source: pooled participants of the Canadian Community Health Survey surveyed from 2005 to 2014, linked to the Registered Persons Database, Canadian Institute for Health Information Discharge Abstract Database, the Ontario Mental Health Reporting System, the National Ambulatory Care Reporting System, and the Ontario Health Insurance Plan billings databases.

<sup>a</sup> Multivariable adjusted rate ratios from Poisson regressions (with balanced repeated replication to produce 95% confidence intervals) for a count of the number of (i) hospitalization or emergency department visits, or (ii) outpatient visits for any mental health condition, per person-days of follow-up for up to 5 years following interview.

<sup>b</sup> Minimally adjusted model includes age, sex, survey cycle, immigrant status, and household income.

<sup>c</sup> Fully adjusted model includes age, sex, survey cycle, immigrant status, household income, having had any mental health visit in the three years prior to survey interview, smoking status, alcohol consumption, physical activity level, and body mass index.

Regarding our binary outcome models (i.e., having had at least one visit during follow-up versus none), the dose-response relationship was again less pronounced in the outpatient setting (Table 3). Still, those reporting the poorest level of life satisfaction exhibited the highest fully adjusted rate ratio of having at least one mental health-related visit in both the hospital/ED setting (rate ratio: 2.58, 95% CI: 1.92, 3.47), as well as the outpatient setting (rate ratio: 1.38, 95% CI: 1.28, 1.50), compared to those most satisfied with life (Table 3).

**Table 3:** Risk ratios<sup>a</sup> and 95% confidence intervals for risks of (i) hospitalization or emergency department visit, or (ii) outpatient visit for any mental health condition (N=131,809)

|                                               | Unadjusted        | Age, sex, cycle-adjusted | Minimally adjusted <sup>b</sup> | Fully adjusted <sup>c</sup> |
|-----------------------------------------------|-------------------|--------------------------|---------------------------------|-----------------------------|
| <b>Hospital or emergency department visit</b> |                   |                          |                                 |                             |
| <i>Very satisfied or satisfied</i>            | Ref.              | Ref.                     | Ref.                            | Ref.                        |
| <i>Neither</i>                                | 2.12 (1.78, 2.53) | 2.23 (1.87, 2.65)        | 2.02 (1.71, 2.40)               | 1.58 (1.33, 1.87)           |
| <i>Dissatisfied</i>                           | 3.73 (3.18, 4.38) | 3.99 (3.40, 4.68)        | 3.16 (2.69, 3.71)               | 2.15 (1.84, 2.52)           |
| <i>Very dissatisfied</i>                      | 5.12 (3.84, 6.83) | 5.77 (4.31, 7.72)        | 4.22 (3.14, 5.67)               | 2.58 (1.92, 3.47)           |
| <b>Outpatient visit</b>                       |                   |                          |                                 |                             |
| <i>Very satisfied or satisfied</i>            | Ref.              | Ref.                     | Ref.                            | Ref.                        |
| <i>Neither</i>                                | 1.40 (1.34, 1.46) | 1.38 (1.33, 1.44)        | 1.37 (1.32, 1.43)               | 1.18 (1.13, 1.23)           |
| <i>Dissatisfied</i>                           | 1.76 (1.68, 1.84) | 1.76 (1.68, 1.84)        | 1.70 (1.62, 1.78)               | 1.33 (1.27, 1.38)           |
| <i>Very dissatisfied</i>                      | 1.93 (1.80, 2.07) | 1.93 (1.79, 2.08)        | 1.84 (1.70, 1.98)               | 1.38 (1.28, 1.50)           |

Source: pooled participants of the Canadian Community Health Survey surveyed from 2005 to 2014, linked to the Registered Persons Database, Canadian Institute for Health Information Discharge Abstract Database, the Ontario Mental Health Reporting System, the National Ambulatory Care Reporting System, and the Ontario Health Insurance Plan billings databases.

<sup>a</sup> Multivariable adjusted risk ratios from modified Poisson regressions (with balanced repeated replication to produce 95% confidence intervals) comparing those who had at least one (i) hospitalization or emergency department visit, or (ii) outpatient visit for any mental health condition, per person-days of follow-up for up to 5 years following interview.

<sup>b</sup> Minimally adjusted model includes age, sex, survey cycle, immigrant status, and household income.

<sup>c</sup> Fully adjusted model includes age, sex, survey cycle, immigrant status, household income, having had any mental health visit in the three years prior to survey interview, smoking status, alcohol consumption, physical activity level, and body mass index.

Examining the joint effects of life satisfaction with household income, compared to the most satisfied, high-income group, the most dissatisfied and low-income group exhibited a fully adjusted rate ratio of 11.25 (95% CI: 5.32, 23.80) visits in the hospital/ED setting, which differed substantially from the fully adjusted model that did not take the joint effects of income into account (rate ratio: 3.71, 95% CI: 2.14, 6.45). In the outpatient setting however, the most dissatisfied and high-income group exhibited the highest rate ratio of 3.33 (95% CI: 1.65, 6.70), exceeding that of the most dissatisfied, low-income group (rate ratios: 1.84, 95% CI: 1.29, 2.63) (Table 4).

**Table 4:** Joint-effects of life satisfaction and income<sup>a,b</sup> on counts of (i) hospitalization or emergency department visits, or (ii) outpatient visits for any mental health condition (N=131,809)



| <b>Hospital or emergency department visit</b> |                     |
|-----------------------------------------------|---------------------|
| <i>Satisfied &amp; high income</i>            | Ref.                |
| <i>Satisfied &amp; mid income</i>             | 1.37 (1.08, 1.73)   |
| <i>Satisfied &amp; low income</i>             | 2.93 (2.23, 3.84)   |
| <i>Neither &amp; high income</i>              | 0.96 (0.67, 1.39)   |
| <i>Neither &amp; mid income</i>               | 2.73 (1.71, 4.35)   |
| <i>Neither &amp; low income</i>               | 6.10 (3.20, 11.61)  |
| <i>Dissatisfied &amp; high income</i>         | 2.74 (1.54, 4.86)   |
| <i>Dissatisfied &amp; mid income</i>          | 4.39 (2.57, 7.50)   |
| <i>Dissatisfied &amp; low income</i>          | 5.33 (3.81, 7.45)   |
| <i>Very dissatisfied &amp; high income</i>    | 6.20 (3.62, 10.64)  |
| <i>Very dissatisfied &amp; mid income</i>     | 3.04 (1.70, 5.43)   |
| <i>Very dissatisfied &amp; low income</i>     | 11.25 (5.32, 23.80) |
| <b>Outpatient visits</b>                      |                     |
| <i>Satisfied &amp; high income</i>            | Ref.                |
| <i>Satisfied &amp; mid income</i>             | 0.89 (0.79, 1.00)   |
| <i>Satisfied &amp; low income</i>             | 1.13 (1.00, 1.28)   |
| <i>Neither &amp; high income</i>              | 1.73 (1.31, 2.27)   |
| <i>Neither &amp; mid income</i>               | 1.50 (1.23, 1.83)   |
| <i>Neither &amp; low income</i>               | 1.64 (1.32, 2.04)   |
| <i>Dissatisfied &amp; high income</i>         | 2.09 (1.55, 2.82)   |
| <i>Dissatisfied &amp; mid income</i>          | 1.94 (1.45, 2.60)   |
| <i>Dissatisfied &amp; low income</i>          | 2.51 (1.98, 3.18)   |
| <i>Very dissatisfied &amp; high income</i>    | 3.33 (1.65, 6.70)   |
| <i>Very dissatisfied &amp; mid income</i>     | 1.37 (1.03, 1.83)   |
| <i>Very dissatisfied &amp; low income</i>     | 1.84 (1.29, 2.63)   |

Source: pooled participants of the Canadian Community Health Survey surveyed from 2005 to 2014, linked to the Registered Persons Database, Canadian Institute for Health Information Discharge Abstract Database, the Ontario Mental Health Reporting System, the National Ambulatory Care Reporting System, and the Ontario Health Insurance Plan billings databases.

<sup>a</sup> Fully adjusted rate ratios from Poisson regressions (with balanced repeated replication to produce 95% confidence intervals) for a count of the number of (i) hospitalization or emergency department visits, or (ii) outpatient visits for any mental health condition, per person-days of follow-up for up to 5 years following interview.

<sup>b</sup> Fully adjusted model includes age, sex, survey cycle, immigrant status, household income, having had any mental health visit in the three years prior to survey interview, smoking status, alcohol consumption, physical activity level, and body mass index.

### ***Sensitivity analyses***

In our count models that excluded participants with a history of a mental health visits or in the first year following their CCHS interview, the overall magnitude and direction of all rate ratios remained consistent. However, rate ratios for those reporting being neither satisfied nor dissatisfied became statistically insignificant in both settings and due to small cell counts, there was considerable uncertainty around the estimate for those reporting being very dissatisfied in the hospital/ED setting



1  
2  
3  
4 (Supplementary Table 2A). Taking the original fully adjusted models and additionally adjusting for  
5  
6 self-rated mental health, the direction of point estimates remained consistent but were attenuated.  
7  
8 Specifically, the rate ratios for those reporting being very dissatisfied became statistically insignificant  
9  
10 in the outpatient setting (Supplementary Table 2B). The rate ratios for those reporting being neither  
11  
12 satisfied nor dissatisfied became statistically insignificant in the hospital/ED setting. In the sensitivity  
13  
14 analysis excluding participants who lost OHIP eligibility for one consecutive year or more, the general  
15  
16 magnitude and direction of all point estimates remained consistent (Supplementary Table 3).  
17  
18 Categorizing missing income observations as a separate response category resulted in no meaningful  
19  
20 differences (Supplementary Table 4). Lastly, the two age strata (18-59 years versus 60 years and over)  
21  
22 exhibited similar point estimates and overlapping confidence intervals (Supplementary Table 5).  
23  
24  
25  
26  
27

## 28 **DISCUSSION**

31 The current study investigated the prospective association between life satisfaction and mental  
32  
33 health-related visits in a provincially representative sample of Ontarian adults. We found that poorer  
34  
35 life satisfaction is associated with increased mental health service use in both hospital/ED and  
36  
37 outpatient settings. Following adjustment for sociodemographic measures, mental health-related visit  
38  
39 history, and health behaviours, point estimates were attenuated but continued to indicate higher rate and  
40  
41 risk ratios for lower levels of life satisfaction. The findings of our joint-effects models showed that  
42  
43 among those most dissatisfied with life, low household income substantially increased the magnitude of  
44  
45 the rate ratio for hospital/ED visits, which was not the case in the outpatient setting.  
46  
47  
48

49 Multiple mechanisms could explain the association between life satisfaction and mental health-  
50  
51 related service use seeing as a variety of broader life contexts and resources that influence health  
52  
53 trajectories have been shown to be associated with life satisfaction. For instance, adults with higher life  
54  
55 satisfaction are more likely to report positive psychological, behavioural, and social resources including  
56  
57  
58  
59

1  
2  
3  
4 higher optimism, social integration, and wealth.<sup>22 23</sup> Regarding psychological resources for instance,  
5  
6 Kim and colleagues (2014) proposed that higher health service utilization may be additionally  
7  
8 explained not only by objectively poorer health, but also by excessive worrying about health status,  
9  
10 resulting in overtreatment.<sup>23</sup> Our study sample largely reflected these findings, wherein more satisfied  
11  
12 individuals did indeed report higher household income levels and exhibited higher instances of health  
13  
14 promoting behaviours.  
15

16  
17  
18 Our findings also showed that low household income exacerbates the observed association  
19  
20 between life satisfaction and mental health-related service use in the hospital/ED setting. The most  
21  
22 dissatisfied low-income group exhibited a substantially higher rate ratio of hospital/ED visits compared  
23  
24 to their higher income counterparts. Yet in the outpatient setting, compared to their most dissatisfied  
25  
26 counterparts, the low-income group exhibited the lowest rate ratio of mental health-related visits. Given  
27  
28 that emergency health care settings are less porous to affordability-related barriers, this finding points  
29  
30 to socioeconomic-related barriers to accessing long-term mental health care. Indeed, studies have  
31  
32 shown that affordability issues (as well as medication, stigma, and trust-related barriers) are associated  
33  
34 with a higher likelihood of experiencing unmet health needs and a lower likelihood of seeking help.<sup>32 33</sup>  
35  
36 In this way, our joint-effects models demonstrated that improving access to long-term mental health-  
37  
38 related care is particularly pertinent for the most dissatisfied and low-income individuals.  
39  
40  
41  
42

43  
44 As established, however, an overburdened health system is not a well-equipped support to  
45  
46 sufficiently meet population mental health needs in a timely manner. Identifying modifiable positive  
47  
48 subjective wellbeing factors associated with improved mental health (and reduced service use) lays  
49  
50 precedence for the development of sustainable approaches to promoting mental wellbeing. Positive  
51  
52 psychology interventions, which encapsulate intentional activities aimed at fostering positive emotions,  
53  
54 cognitions, and behaviours, provide one potential approach to modifying life satisfaction and generally  
55  
56 maintaining or improving psychological wellbeing. Two meta-analyses explored the effectiveness of  
57  
58  
59

Life satisfaction and mental health service use

1  
2  
3  
4 positive psychology interventions and found that they can increase levels of subjective wellbeing in  
5  
6 both younger and older adult populations.<sup>34-36</sup> However the applicability of larger-scale applications of  
7  
8 positive psychology interventions does require further study.  
9

### 10 11 12 **Limitations** 13

14  
15 Our study has a number of limitations that should be considered when interpreting the findings.  
16  
17 It is possible that the associations observed reflect the negative influence of baseline poor mental health  
18  
19 on life satisfaction. In fact, other studies have found that mental illness and negative affect are key  
20  
21 determinants of individual perceptions of life satisfaction.<sup>22 37</sup> However, the cohort study design (which  
22  
23 is a key advantage over previous studies) and the results of our sensitivity analyses (which considered  
24  
25 previous mental health-related visits with a one year wash-out period, and considered an adjustment for  
26  
27 self-rated mental health) showed that prospective associations remained robust. Still, we could not  
28  
29 entirely account for negative affect uncaptured by the mental health service system or self-rated mental  
30  
31 health, which could confound reported life satisfaction and subsequent service use. Another limitation  
32  
33 to consider is that life satisfaction was only measured once at baseline meaning that any changes that  
34  
35 may influence the outcome were not captured. Similarly, health behaviours such as smoking and  
36  
37 drinking could have changed over the follow-up period, and this potential misclassification could affect  
38  
39 the confounding control of our model's health behaviours, which we note were important. We were also  
40  
41 unable to distinguish between different types of mental health visits, given that billing codes for  
42  
43 conditions are not validated for any mental health conditions other than schizophrenia.<sup>38 39</sup> The  
44  
45 outcomes examined represent health service use for mental health and should not be interpreted as a  
46  
47 diagnosis for a particular mental health condition. Lastly, our findings are not directly applicable to  
48  
49 sub-populations excluded from the CCHS sampling frame. Unrepresented populations include  
50  
51 Indigenous populations living on reserve, individuals in the military, and those living in institutions.  
52  
53  
54  
55  
56  
57  
58  
59

**Conclusion**

Conceptualizing positive mental wellbeing and health deficits on a dual continuum, our study contributes to a growing body of evidence that connects positive wellbeing with meaningful health system outcomes. The findings of this study emphasize the value in identifying positive wellbeing factors associated with subsequent mental health-related service use, strengthening an evidence base that supports the development of innovative and sustainable mental health interventions.

Life satisfaction and mental health service use

1  
2  
3  
4 **Figure captions:**

5 **Figure 1.** Flow chart of study population from pooled Ontario components of Statistics Canada's  
6 Canadian Community Health Surveys (CCHS, 2005-2014) linked to health administrative data through  
7 the Registered Persons Database (RPDB).  
8  
9  
10

11  
12 **REQUIRED STATEMENTS**

13  
14 **Author contributions:** CAM contributed to the design, analysis, and interpretation of data, and drafted  
15 the article; LMD contributed to the design and interpretation of data, and critically revised the article;  
16 MH contributed to the analysis of data, and critically revised the article; VG contributed to the design  
17 and interpretation of the study, and critically revised the article; LCR contributed to the conception,  
18 design, and interpretation of data, and critically revised the article. All authors have given final  
19 approval of the version to be published, and LCR has agreed to act as the guarantor of the work.  
20  
21  
22  
23  
24  
25  
26  
27  
28  
29

30 **Competing interests:** None declared.  
31  
32  
33  
34

35 **Funding Information:** LCR is funded by a Canada Research Chair (950-230702).  
36  
37  
38  
39

40 **Data sharing:** The dataset from this study is held securely in coded form at ICES. While data sharing  
41 agreements prohibit ICES from making the dataset publicly available, access may be granted to those  
42 who meet pre-specified criteria for confidential access, available at [www.ices.on.ca/DAS](http://www.ices.on.ca/DAS). The full  
43 dataset creation plan and underlying analytic code are available from the authors upon request,  
44 understanding that the computer programs may rely upon coding templates or macros that are unique to  
45 ICES and are therefore either inaccessible or may require modification.  
46  
47  
48  
49  
50  
51

52 **Ethical approval:** The study design received ethics approval from the University of Toronto's ethics  
53 board (protocol #39444).  
54  
55  
56  
57  
58  
59  
60

1  
2  
3  
4 **Acknowledgements:** This study was supported by ICES, which is funded by an annual grant from the  
5  
6 Ontario Ministry of Health and Long-Term Care (MOHLTC). Parts of this material are based on data  
7  
8 and/or information compiled and provided by CIHI. However, the analyses, conclusions, opinions and  
9  
10 statements expressed in the material are those of the author(s), and not necessarily those of CIHI.. The  
11  
12 analyses, conclusions, opinions and statements expressed herein are solely those of the authors and do  
13  
14 not reflect those of the funding or data sources; no endorsement is intended or should be inferred.  
15  
16  
17  
18  
19  
20  
21  
22  
23  
24  
25  
26  
27  
28  
29  
30  
31  
32  
33  
34  
35  
36  
37  
38  
39  
40  
41  
42  
43  
44  
45  
46  
47  
48  
49  
50  
51  
52  
53  
54  
55  
56  
57  
58  
59  
60

## References

1. Whiteford HA, Degenhardt L, Rehm J, et al. Global burden of disease attributable to mental and substance use disorders: findings from the Global Burden of Disease Study 2010. *The Lancet* 2013;382(9904):1575-86. doi: [https://doi.org/10.1016/S0140-6736\(13\)61611-6](https://doi.org/10.1016/S0140-6736(13)61611-6)
2. Smetanin P, Stiff D, Briante C, et al. The life and economic impact of major mental illnesses in Canada: 2011-2014. : RiskAnalytica on behalf of the Mental Health Commission of Canada, 2011.
3. Prince M, Patel V, Saxena S, et al. No health without mental health. *The Lancet* 2007;370(9590):859-77. doi: 10.1016/S0140-6736(07)61238-0
4. World Health Organization. Mental health action plan 2013 - 2020. Geneva, Switzerland: World Health Organization, 2013:1-45.
5. Ratnasingham S, Cairney J, Rehm J, et al. Opening eyes, opening minds: the Ontario burden of mental illness and addictions report. Toronto: Insititute for Clinical and Evaluative Siences and Public Health Ontario, 2012.
6. Office of the Auditor General of Ontario. Annual Report. Toronto: Office of the Auditor General of Ontario, Queen's Printer for Ontario, 2016.
7. Centre for Addictions and Mental Health. Mental illness and addiction: facts and statistics. 2020 [Available from: <https://www.camh.ca/en/driving-change/the-crisis-is-real/mental-health-statistics>].
8. Chiu M, Amartey A, Wang X, et al. Trends in objectively measured and perceived mental health and use of mental health services: a population-based study in Ontario, 2002-2014. *Canadian Medical Association Journal* 2020;192(13):E329-E37. doi: <https://doi.org/10.1503/cmaj.190603>
9. Stuart HL. Matching community mental health services to needs. Results of the Southeastern Ontario community comprehensive assessment project. Kingston, Ontario: The Southeastern Ontario Mental Health Implementation Task Force, 2002.
10. Canadian Institute for Health Information. Health system resources for mental health and addictions care in Canada. Ottawa, Ontario: Canadian Institute for Health Information, 2019.
11. VanderWeele TJ, Chen Y, Long K, et al. Positive Epidemiology? *Epidemiology* 2020;31(2):189-93. doi: 10.1097/ede.0000000000001147
12. Keyes CL. Promoting and protecting mental health as flourishing: a complementary strategy for improving national mental health. *The American psychologist* 2007;62(2):95-108. doi: 10.1037/0003-066x.62.2.95 [published Online First: 2007/02/28]
13. WHO. Promoting mental health: Concepts, emerging evidence, practice - Summary Report. In: Organization WH, ed. Geneva, Switzerland, 2004.
14. Keyes CLM, Dhingra SS, Simoes EJ. Change in level of positive mental health as a predictor of future risk of mental illness. *American Journal of Public Health* 2010;100(12):2366-71. doi: 10.2105/AJPH.2010.192245 [published Online First: 2010/10/21]
15. Bergsma A, Have Mt, Veenhoven R, et al. Most people with mental disorders are happy: A 3-year follow-up in the Dutch general population. *The Journal of Positive Psychology* 2011;6(4):253-59. doi: 10.1080/17439760.2011.577086
16. Wood AM, Joseph S. The absence of positive psychological (eudemonic) well-being as a risk factor for depression: a ten year cohort study. *Journal of Affective Disorders* 2010;122(3):213-7. doi: 10.1016/j.jad.2009.06.032 [published Online First: 2009/08/27]
17. Koivumaa-Honkanen H, Honkanen R, Viinamaki H, et al. Life satisfaction and suicide: A 20-year follow-up study. *American Journal of Psychiatry* 2001;158(3):433-39.



18. Koivumaa-Honkanen H, Koskenvuo M, Honkanen RJ, et al. Life dissatisfaction and subsequent work disability in an 11-year follow-up. *Psychological Medicine* 2004;34(2):221-28.
19. DeProphetis E, Goel V, Watson T, et al. The relationship between life satisfaction and preventable hospitalizations: a population-based cohort study in Ontario, Canada *BMJ Open* 2020;10:e032837
20. Rosella L, Longdi F, Buajitti E, et al. Death and chronic disease risk associated with poor life satisfaction: a population-based cohort study. *American Journal of Epidemiology* 2018;188(2):323-31.
21. Goel V, Rosella LC, Longdi F, et al. The relationship between life satisfaction and healthcare utilization: A longitudinal study. *American Journal of Preventive Medicine* 2018;55(2):142-50.
22. Lombardo P, Jones W, Wang L, et al. The fundamental association between mental health and life satisfaction: results from successive waves of a Canadian national survey. *BMC Public Health* 2018;18:342. doi: 10.1186/s12889-018-5235-x
23. Kim ES, Park N, Sun JK, et al. Life satisfaction and frequency of doctor visits. *Psychosomatic Medicine* 2014;76(1):86.
24. Helliwell JF, Aknin LB. Expanding the social science of happiness. *Nature Human Behaviour* 2018;2(4):248-52. doi: 10.1038/s41562-018-0308-5
25. Diener E, Chan MY. Happy people live longer: subjective well-being contributes to health and longevity. *Applied Psychology-Health and Well Being* 2011;3(1):1-43.
26. Beland Y. Canadian Community Health Survey, Methodological overview. *Health Reports* 2002;13(3):9-14.
27. Lucas RE, Donnellan MB. How stable is happiness? Using the STARTS model to estimate the stability of life satisfaction. *J Res Pers* 2007;41(5):1091-98. doi: 10.1016/j.jrp.2006.11.005
28. Schimmack U, Diener E, Oishi S. Life-satisfaction is a momentary judgment and a stable personality characteristic: the use of chronically accessible and stable sources. *Journal of personality* 2002;70(3):345-84. doi: 10.1111/1467-6494.05008 [published Online First: 2002/06/07]
29. Bonikowska A, Helliwell JF, Hou F, et al. An assessment of life satisfaction responses on recent Statistics Canada surveys. *Social Indicators Research* 2014;118(2):617-43.
30. Cheung F, Lucas RE. Assessing the validity of single-item life satisfaction measures: results from three large samples. *Quality of Life Research* 2014;23(10):2809-18. doi: 10.1007/s11136-014-0726-4
31. Kolenikov S. Resampling variance estimation for complex survey data. *Stata Journal* 2010;10(2):165-99.
32. Corscadden L, Callander EJ, Topp SM. Who experiences unmet need for mental health services and what other barriers to accessing health care do they face? Findings from Australia and Canada. *The International journal of health planning and management* 2019;34(2):761-72. doi: 10.1002/hpm.2733 [published Online First: 2019/01/19]
33. Corrigan PW, Druss BG, Perlick DA. The impact of mental illness stigma on seeking and participating in mental health care. *Psychological science in the public interest: a journal of the American Psychological Society* 2014;15(2):37-70. doi: 10.1177/1529100614531398 [published Online First: 2015/07/15]
34. Proyer RT, Gander F, Wellenzohn S, et al. Positive psychology interventions in people aged 50–79 years: Long-term effects of placebo-controlled online interventions on well-being and depression. *Aging & Mental Health* 2014;18(8):997-1005. doi: <http://dx.doi.org/10.1080/13607863.2014.899978>



- 1  
2  
3  
4 35. Bolier L, Haverman M, Westerhof GJ, et al. Positive psychology interventions: a meta-analysis of  
5 randomized controlled studies. *BMC Public Health* 2013;13:119. doi:  
6 <http://dx.doi.org/10.1186/1471-2458-13-119>  
7  
8 36. Sin NL, Lyubomirsky S. Enhancing well-being and alleviating depressive symptoms with positive  
9 psychology interventions: a practice-friendly meta-analysis. *Journal of clinical psychology*  
10 2009;65(5):467-87. doi: 10.1002/jclp.20593 [published Online First: 2009/03/21]  
11 37. Chisholm D, Layard R, Patel V, et al. Mental illness and unhappiness. *CEP Discussion Papers,*  
12 *Centre for Economic Performance* 2013  
13 38. MHASEF Research Team. Mental Health and Addictions System Performance in Ontario: A  
14 Baseline Scorecard. Toronto, ON: Institute for Clinical Evaluative Sciences, 2018.  
15 39. Kurdyak P, Lin E, Green D, et al. Validation of a population-based algorithm to detect chronic  
16 psychotic illness. *Canadian Journal of Psychiatry* 2015;60(8):362-68. doi:  
17 10.1177/070674371506000805  
18  
19  
20  
21  
22  
23  
24  
25  
26  
27  
28  
29  
30  
31  
32  
33  
34  
35  
36  
37  
38  
39  
40  
41  
42  
43  
44  
45  
46  
47  
48  
49  
50  
51  
52  
53  
54  
55  
56  
57  
58  
59  
60

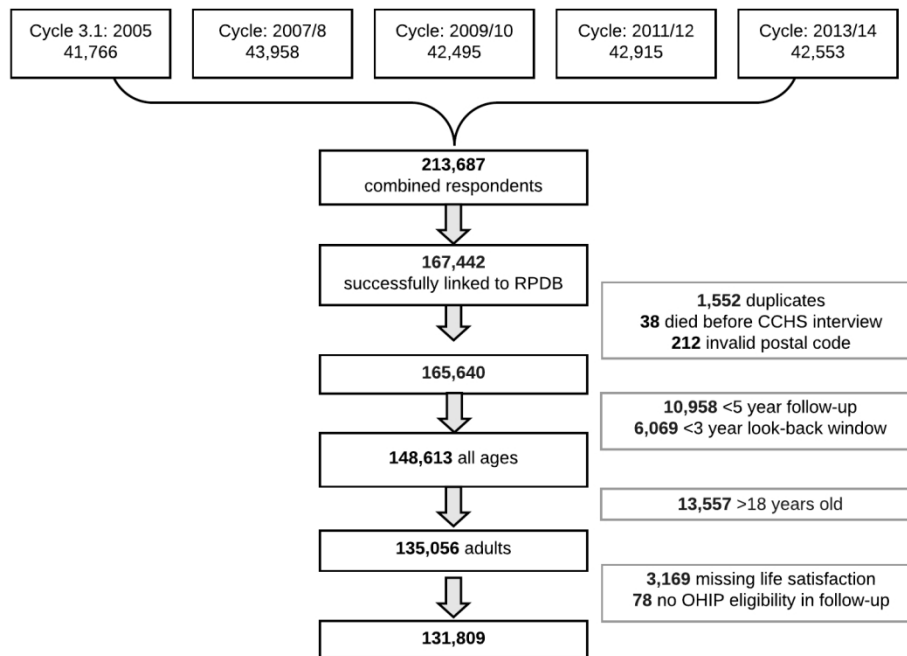

Figure 1. Flow chart of study population from pooled Ontario components of Statistics Canada's Canadian Community Health Surveys (CCHS, 2005-2014) linked to health administrative data through the Registered Persons Database (RPDB).

**Supplementary Table 1A: Source databases and corresponding ICD-9 or -10 codes defining mental health visits in each respective study setting.**

| <b>Hospitalization/emergency department visit for any mental health condition</b>                |                                                                                                                                                                                                                                                                                                                                                                                                                                                                                                                                                                                                                                                                                                                                       |
|--------------------------------------------------------------------------------------------------|---------------------------------------------------------------------------------------------------------------------------------------------------------------------------------------------------------------------------------------------------------------------------------------------------------------------------------------------------------------------------------------------------------------------------------------------------------------------------------------------------------------------------------------------------------------------------------------------------------------------------------------------------------------------------------------------------------------------------------------|
| ICD-9 codes<br>(OMHRS - DSM IV)                                                                  | Any OMHRS (including missing, excluding 290.x, 294.x in primary diagnosis)<br>Exclude if Dxcode missing and provisional=2                                                                                                                                                                                                                                                                                                                                                                                                                                                                                                                                                                                                             |
| ICD-10 codes<br>(NACRS/DAD)                                                                      | DX10CODE1= F09-F99<br>DX10CODE2-25 = X60-X84, Y10-Y19, Y28 when DX10CODE1 ne F06-F99                                                                                                                                                                                                                                                                                                                                                                                                                                                                                                                                                                                                                                                  |
| <b>Outpatient (primary care/psychiatrist/pediatrician) visit for any mental health condition</b> |                                                                                                                                                                                                                                                                                                                                                                                                                                                                                                                                                                                                                                                                                                                                       |
| ICD-9 codes<br>(OHIP)                                                                            | 291-293, 295-319<br><br>Psychiatrist [SPEC=19] and outpatient (LOCATION: O, L, H) and non-lab service [substr(FEECODE,1,1) ne 'G'], <i>OR</i><br><br>FP/GP [SPEC=00] and MHA diagnosis code [DXCODE] and outpatient (LOCATION: O, L, H) and non-lab service [substr(FEECODE,1,1) ne 'G'], <i>OR</i><br><br>Paediatrician [SPEC=26] and undefined location (LOCATION =U) and MHA diagnosis code [DXCODE] and fee code (FEECODE=K122 or K123 or K704). Paediatrician fee code description:<br>K122 Developmental and/or behavioural care - individual developmental and/or behavioural care<br>K123 Developmental and/or behavioural care - family developmental and/or behavioural care<br>K704 Paediatric out-patient case conference |

Abbreviations: ICD International Classification of Disease; DSM Diagnostic and Statistical Manual of Mental Disorders; OMHRS Ontario Mental Health Reporting System; NACRS National Ambulatory Care Reporting System; DAD Distract Abstract Database; OHIP Ontario Health Insurance Plan; FP Family physician; GP General practitioner; Dxcode Diagnosis code

**Supplementary Table 1B:** Detailed breakdown of CCHS-derived covariate categorizations used in regression models.

| Focal Exposure    | Source and classification details                                                                                                                                                                                                                                                                                                                                                                                                                                                                                                                                                                                                                                                                                                                                                                                                                                                                                                        |
|-------------------|------------------------------------------------------------------------------------------------------------------------------------------------------------------------------------------------------------------------------------------------------------------------------------------------------------------------------------------------------------------------------------------------------------------------------------------------------------------------------------------------------------------------------------------------------------------------------------------------------------------------------------------------------------------------------------------------------------------------------------------------------------------------------------------------------------------------------------------------------------------------------------------------------------------------------------------|
| Life satisfaction | <p><b>Source:</b> CCHS</p> <p><b>Question:</b> Using a scale of 0 to 10, where 0 means "Very dissatisfied" and 10 means "Very satisfied", how do you feel about your life as a whole right now? (Response options: 0-10)</p> <p><b>Analytic classification:</b></p> <ul style="list-style-type: none"> <li>(1) <i>Very satisfied/satisfied</i> (6,7,8/9,10)</li> <li>(2) <i>Neither</i> (5)</li> <li>(3) <i>Dissatisfied</i> (2,3,4)</li> <li>(4) <i>Very dissatisfied</i> (0,1)</li> </ul>                                                                                                                                                                                                                                                                                                                                                                                                                                              |
| <b>Covariates</b> |                                                                                                                                                                                                                                                                                                                                                                                                                                                                                                                                                                                                                                                                                                                                                                                                                                                                                                                                          |
| Age               | <p><b>Source:</b> Registered Persons Database (contains information on persons registered under the Ontario Health Insurance Plan (OHIP))</p> <p><b>Analytic classification:</b> <i>continuous, 18 and over</i></p>                                                                                                                                                                                                                                                                                                                                                                                                                                                                                                                                                                                                                                                                                                                      |
| Sex               | <p><b>Source:</b> Registered Persons Database</p> <p><b>Analytic classification:</b></p> <ul style="list-style-type: none"> <li>(1) <i>Male</i></li> <li>(2) <i>Female</i></li> </ul>                                                                                                                                                                                                                                                                                                                                                                                                                                                                                                                                                                                                                                                                                                                                                    |
| Immigrant status  | <p><b>Source:</b> CCHS</p> <p><b>Question:</b> Were you born a Canadian citizen? (Response options: Yes/No)</p> <p><b>Analytic classification:</b></p> <ul style="list-style-type: none"> <li>(1) <i>Immigrant</i> (No)</li> <li>(2) <i>Canadian-born</i> (Yes)</li> </ul>                                                                                                                                                                                                                                                                                                                                                                                                                                                                                                                                                                                                                                                               |
| Household income  | <p><b>Source:</b> CCHS</p> <p><b>Question:</b> Thinking about the total income for all household members, from which of the following sources did your household receive any income in the past 12 months?</p> <p><b>Analytic classification:</b> Income deciles are determined by Statistics Canada, which are grouped by the distribution of an adjusted ratio of their total reported household income to the low income cut-off corresponding to their household and community size. It provides, for each respondent, a relative measure of their household income to the household incomes of all other respondent. We collapsed 10 categories into 5.</p> <ul style="list-style-type: none"> <li>(1) <i>Lowest income quintile</i> (quintile 1, 2)</li> <li>(2) <i>Quintile 3, 4</i></li> <li>(3) <i>Quintile 5, 6</i></li> <li>(4) <i>Quintile 7, 8</i></li> <li>(5) <i>Highest income quintile</i> (quintile 9, 10).</li> </ul> |
| Smoking status    | <p><b>Source:</b> CCHS</p> <p><b>Question:</b> Several variables examining the number of cigarettes smoked per day currently and formerly, a binary measure of having ever smoked 100 or more cigarettes</p> <p><b>Analytic classification:</b></p> <ul style="list-style-type: none"> <li>(1) <i>Current smoker:</i> smokes daily (smoked at least 100 lifetime cigarettes)</li> <li>(2) <i>Former smoker:</i> smoked regularly or occasionally in the past and no longer does (including smoked at least 100 lifetime cigarettes)</li> <li>(3) <i>Never smoker:</i> has indicated no current or former smoking habits, or has smoked less than 100 lifetime cigarettes</li> </ul>                                                                                                                                                                                                                                                      |

|                         |                                                                                                                                                                                                                                                                                                                                                                                                                                                                                                                                                                                                                                                                                                                                                                                                                                                                          |
|-------------------------|--------------------------------------------------------------------------------------------------------------------------------------------------------------------------------------------------------------------------------------------------------------------------------------------------------------------------------------------------------------------------------------------------------------------------------------------------------------------------------------------------------------------------------------------------------------------------------------------------------------------------------------------------------------------------------------------------------------------------------------------------------------------------------------------------------------------------------------------------------------------------|
| Alcohol consumption     | <p><b>Source:</b> CCHS</p> <p><b>Question:</b> Several variables examining frequency and amount of alcohol consumption</p> <p><b>Analytic classification:</b></p> <p>(1) <i>Regular and binge drinker:</i> has consumed alcohol in the past year with a frequency ranging from once a month to daily, and has engaged in binge drinking (defined as 4 drinks for females and 5 drinks for males in one sitting) at any frequency</p> <p>(2) <i>Regular drinker:</i> has consumed alcohol in the past year with a frequency ranging from once a month to daily, and has never engaged in binge drinking</p> <p>(3) <i>Occasional:</i> has consumed alcohol in the past year with a frequency of less than once per month</p> <p>(4) <i>Non-drinker:</i> no alcohol consumption in the past year</p>                                                                       |
| Physical activity level | <p><b>Source:</b> CCHS</p> <p><b>Question:</b> This variable is based on the participants' leisure time total daily Energy Expenditure values (kcal/kg/day). <i>Energy Expenditure for each activity = (N X D X METvalue) / 365</i></p> <p>N=number of times a respondent engaged in an activity over a 12 month period</p> <p>D= average duration in hours of the activity</p> <p>MET value=the energy cost of the activity expressed as kilocalories expended per kilogram of body weight per hour of activity (kcal/kg per hour)/365 (to convert yearly data into daily data); the low-intensity MET value was used for calculations.</p> <p><b>Analytic classification:</b></p> <p>(1) <i>Active</i> (<math>EE \geq 3</math>)</p> <p>(2) <i>Moderately active</i> (<math>1.5 \leq EE &lt; 3</math>)</p> <p>(3) <i>Inactive</i> (<math>0 \leq EE &lt; 1.5</math>)</p> |
| Body mass index (BMI)   | <p><b>Source:</b> CCHS</p> <p><b>Question:</b> Self-reported height and weight</p> <p><b>Analytic classification:</b> International standard of BMI classification (kg/m<sup>2</sup>) for adults aged 18 and over</p> <p>(1) <i>Underweight</i> (&lt;18.5)</p> <p>(2) <i>Normal</i> (18.5-24.9)</p> <p>(3) <i>Overweight</i> (25-29.9)</p> <p>(4) <i>Moderately obese</i> (30-34.9)</p> <p>(5) <i>Very obese</i> (<math>\geq 35</math>)</p>                                                                                                                                                                                                                                                                                                                                                                                                                              |

**Supplementary Table 2A:** Fully adjusted rate ratios<sup>a,b</sup> and 95% confidence intervals for counts of (i) hospitalization or emergency department visits, or (ii) outpatient visits for any mental health condition, excluding participants had any mental health visit three years prior to or 1 year following interview (N=84,528)

| <b>Hospital or emergency department visit</b> |                    |
|-----------------------------------------------|--------------------|
| <i>Very satisfied or satisfied</i>            | Ref.               |
| <i>Neither</i>                                | 1.51 (0.74, 3.08)  |
| <i>Dissatisfied</i>                           | 2.23 (1.27, 3.89)  |
| <i>Very dissatisfied</i>                      | 3.97 (0.40, 40.54) |
| <b>Outpatient visit</b>                       |                    |
| <i>Very satisfied or satisfied</i>            | Ref.               |
| <i>Neither</i>                                | 1.19 (0.97, 1.46)  |
| <i>Dissatisfied</i>                           | 1.72 (1.06, 2.79)  |
| <i>Very dissatisfied</i>                      | 2.15 (1.21, 3.83)  |

**Supplementary Table 2B:** Fully adjusted rate ratios<sup>a,b</sup> and 95% confidence intervals for counts of (i) hospitalization or emergency department visits, or (ii) outpatient visits for any mental health condition, additionally adjusting for self-rated mental health (N=131,809)

| <b>Hospital or emergency department visit</b> |                   |
|-----------------------------------------------|-------------------|
| <i>Very satisfied or satisfied</i>            | Ref.              |
| <i>Neither</i>                                | 1.45 (0.93, 2.24) |
| <i>Dissatisfied</i>                           | 1.46 (1.10, 1.95) |
| <i>Very dissatisfied</i>                      | 2.23 (1.28, 3.86) |
| <b>Outpatient visit</b>                       |                   |
| <i>Very satisfied or satisfied</i>            | Ref.              |
| <i>Neither</i>                                | 1.16 (1.02, 1.32) |
| <i>Dissatisfied</i>                           | 1.31 (1.11, 1.55) |
| <i>Very dissatisfied</i>                      | 1.04 (0.80, 1.34) |

Source: pooled participants of the Canadian Community Health Survey surveyed from 2005 to 2014, linked to the Registered Persons Database, Canadian Institute for Health Information Discharge Abstract Database, the Ontario Mental Health Reporting System, the National Ambulatory Care Reporting System, and the Ontario Health Insurance Plan billings databases.

<sup>a</sup> Multivariable adjusted rate ratios from Poisson regressions (with balanced repeated replication to produce 95% confidence intervals) for a count of the number of (i) hospitalization or emergency department visits, or (ii) outpatient visits for any mental health condition, per person-days of follow-up, within 5 years following Canadian Community Health Survey interview.

<sup>b</sup> Fully adjusted model includes self-rated mental health, age, sex, survey cycle, immigrant status, household income, having had any mental health visit in the three years prior to survey interview, smoking status, alcohol consumption, physical activity level, and body mass index with an additional adjustment for self-rated mental health.

**Supplementary Table 3:** Fully adjusted rate ratios<sup>a,b</sup> and 95% confidence intervals for counts of (i) hospitalization or emergency department visits, or (ii) outpatient visits for any mental health condition, excluding participants who lost OHIP eligibility for more than 1 consecutive year (N=125,304).

| <b>Hospital or emergency department visit</b> |                   |
|-----------------------------------------------|-------------------|
| <i>Very satisfied or satisfied</i>            | Ref.              |
| <i>Neither</i>                                | 1.90 (1.30, 2.78) |
| <i>Dissatisfied</i>                           | 2.23 (1.70, 2.92) |
| <i>Very dissatisfied</i>                      | 3.82 (2.16, 6.73) |
| <b>Outpatient visit</b>                       |                   |
| <i>Very satisfied or satisfied</i>            | Ref.              |
| <i>Neither</i>                                | 1.64 (1.44, 1.86) |
| <i>Dissatisfied</i>                           | 2.22 (1.89, 2.61) |
| <i>Very dissatisfied</i>                      | 1.85 (1.42, 2.41) |

Source: pooled participants of the Canadian Community Health Survey surveyed from 2005 to 2014, linked to the Registered Persons Database, Canadian Institute for Health Information Discharge Abstract Database, the Ontario Mental Health Reporting System, the National Ambulatory Care Reporting System, and the Ontario Health Insurance Plan billings databases.

<sup>a</sup> Multivariable adjusted rate ratios from Poisson regressions (with balanced repeated replication to produce 95% confidence intervals) for a count of the number of (i) hospitalization or emergency department visits, or (ii) outpatient visits for any mental health condition, per person-days of follow-up, within 5 years following Canadian Community Health Survey interview.

<sup>b</sup> Fully adjusted model includes age, sex, survey cycle, immigrant status, household income, having had any mental health visit in the three years prior to survey interview, smoking status, alcohol consumption, physical activity level, and body mass index.

**Supplementary Table 4:** Fully adjusted rate ratios<sup>a,b</sup> and 95% confidence intervals for counts of (i) hospitalization or emergency department visits, or (ii) outpatient visits for any mental health condition, with missing income observations categorized as a separate category (N=131,809).

| <b>Hospital or emergency department visit</b> |                   |
|-----------------------------------------------|-------------------|
| <i>Very satisfied or satisfied</i>            | Ref.              |
| <i>Neither</i>                                | 1.87 (1.29, 2.72) |
| <i>Dissatisfied</i>                           | 2.28 (1.77, 2.94) |
| <i>Very dissatisfied</i>                      | 3.67 (2.12, 6.38) |
| <b>Outpatient visit</b>                       |                   |
| <i>Very satisfied or satisfied</i>            | Ref.              |
| <i>Neither</i>                                | 1.61 (1.42, 1.83) |
| <i>Dissatisfied</i>                           | 2.19 (1.87, 2.56) |
| <i>Very dissatisfied</i>                      | 1.82 (1.41, 2.35) |

Source: pooled participants of the Canadian Community Health Survey surveyed from 2005 to 2014, linked to the Registered Persons Database, Canadian Institute for Health Information Discharge Abstract Database, the Ontario Mental Health Reporting System, the National Ambulatory Care Reporting System, and the Ontario Health Insurance Plan billings databases.

<sup>a</sup> Multivariable adjusted rate ratios from Poisson regressions (with balanced repeated replication to produce 95% confidence intervals) for a count of the number of (i) hospitalization or emergency department visits, or (ii) outpatient visits for any mental health condition, per person-days of follow-up, within 5 years following Canadian Community Health Survey interview.

<sup>b</sup> Fully adjusted model includes age, sex, survey cycle, immigrant status, household income, having had any mental health visit in the three years prior to survey interview, smoking status, alcohol consumption, physical activity level, and body mass index.



**Supplementary Table 5:** Fully adjusted rate ratios<sup>a,b</sup> and 95% confidence intervals for counts of (i) hospitalization or emergency department visits, or (ii) outpatient visits for any mental health condition, stratified by age group (18-59 years/60 years and over; N=131,809).

| <b>Hospital or emergency department visit</b> | <b>18-59 years</b><br>(N=83,851) | <b>60 years and over</b><br>(N=47,958) |
|-----------------------------------------------|----------------------------------|----------------------------------------|
| <i>Very satisfied or satisfied</i>            | Ref.                             | Ref.                                   |
| <i>Neither</i>                                | 1.96 (1.33, 2.94)                | 1.31 (0.95, 1.80)                      |
| <i>Dissatisfied</i>                           | 2.29 (1.72, 3.04)                | 2.53 (1.72, 3.72)                      |
| <i>Very dissatisfied</i>                      | 3.69 (1.98, 6.89)                | 3.81 (1.86, 7.83)                      |
| <b>Outpatient visit</b>                       |                                  |                                        |
| <i>Very satisfied or satisfied</i>            | Ref.                             | Ref.                                   |
| <i>Neither</i>                                | 1.68 (1.45, 1.96)                | 1.33 (1.08, 1.65)                      |
| <i>Dissatisfied</i>                           | 2.26 (1.91, 2.69)                | 1.44 (1.17, 1.77)                      |
| <i>Very dissatisfied</i>                      | 1.77 (1.30, 2.41)                | 1.65 (1.25, 2.19)                      |

Source: pooled participants of the Canadian Community Health Survey surveyed from 2005 to 2014, linked to the Registered Persons Database, Canadian Institute for Health Information Discharge Abstract Database, the Ontario Mental Health Reporting System, the National Ambulatory Care Reporting System, and the Ontario Health Insurance Plan billings databases.

<sup>a</sup> Multivariable adjusted rate ratios from Poisson regressions (with balanced repeated replication to produce 95% confidence intervals) for a count of the number of (i) hospitalization or emergency department visits, or (ii) outpatient visits for any mental health condition, per person-days of follow-up, within 5 years following Canadian Community Health Survey interview.

<sup>b</sup> Fully adjusted model includes age, sex, survey cycle, immigrant status, household income, having had any mental health visit in the three years prior to survey interview, smoking status, alcohol consumption, physical activity level, and body mass index.

**STROBE 2007 (v4) Statement—Checklist of items that should be included in reports of *cohort studies***

| Section/Topic                | Item # | Recommendation                                                                                                                                                                       | Reported on page #     |
|------------------------------|--------|--------------------------------------------------------------------------------------------------------------------------------------------------------------------------------------|------------------------|
| Title and abstract           | 1      | (a) Indicate the study's design with a commonly used term in the title or the abstract                                                                                               | 1                      |
|                              |        | (b) Provide in the abstract an informative and balanced summary of what was done and what was found                                                                                  | 2                      |
| <b>Introduction</b>          |        |                                                                                                                                                                                      |                        |
| Background/rationale         | 2      | Explain the scientific background and rationale for the investigation being reported                                                                                                 | 4                      |
| Objectives                   | 3      | State specific objectives, including any prespecified hypotheses                                                                                                                     | 4                      |
| <b>Methods</b>               |        |                                                                                                                                                                                      |                        |
| Study design                 | 4      | Present key elements of study design early in the paper                                                                                                                              | 6                      |
| Setting                      | 5      | Describe the setting, locations, and relevant dates, including periods of recruitment, exposure, follow-up, and data collection                                                      | 6                      |
| Participants                 | 6      | (a) Give the eligibility criteria, and the sources and methods of selection of participants. Describe methods of follow-up                                                           | 6-7                    |
|                              |        | (b) For matched studies, give matching criteria and number of exposed and unexposed                                                                                                  | NA                     |
| Variables                    | 7      | Clearly define all outcomes, exposures, predictors, potential confounders, and effect modifiers. Give diagnostic criteria, if applicable                                             | 7-8                    |
| Data sources/<br>measurement | 8*     | For each variable of interest, give sources of data and details of methods of assessment (measurement). Describe comparability of assessment methods if there is more than one group | 7-8<br>(Supplement 1B) |
| Bias                         | 9      | Describe any efforts to address potential sources of bias                                                                                                                            | 9                      |
| Study size                   | 10     | Explain how the study size was arrived at                                                                                                                                            | 7<br>(Figure 1)        |
| Quantitative variables       | 11     | Explain how quantitative variables were handled in the analyses. If applicable, describe which groupings were chosen and why                                                         | 7-8<br>(Supplement 1B) |
| Statistical methods          | 12     | (a) Describe all statistical methods, including those used to control for confounding                                                                                                | 9-10                   |
|                              |        | (b) Describe any methods used to examine subgroups and interactions                                                                                                                  | 9                      |
|                              |        | (c) Explain how missing data were addressed                                                                                                                                          | 9                      |
|                              |        | (d) If applicable, explain how loss to follow-up was addressed                                                                                                                       | 10, death (offset)     |
|                              |        | (e) Describe any sensitivity analyses                                                                                                                                                | 9                      |

|                          |     |                                                                                                                                                                                                              |                              |
|--------------------------|-----|--------------------------------------------------------------------------------------------------------------------------------------------------------------------------------------------------------------|------------------------------|
| <b>Results</b>           |     |                                                                                                                                                                                                              |                              |
| Participants             | 13* | (a) Report numbers of individuals at each stage of study—eg numbers potentially eligible, examined for eligibility, confirmed eligible, included in the study, completing follow-up, and analysed            | 7<br>(Figure 1)              |
|                          |     | (b) Give reasons for non-participation at each stage                                                                                                                                                         | 7                            |
|                          |     | (c) Consider use of a flow diagram                                                                                                                                                                           | Figure 1                     |
| Descriptive data         | 14* | (a) Give characteristics of study participants (eg demographic, clinical, social) and information on exposures and potential confounders                                                                     | 11, 12 (Table 1)             |
|                          |     | (b) Indicate number of participants with missing data for each variable of interest                                                                                                                          | 9 (max missingness reported) |
|                          |     | (c) Summarise follow-up time (eg, average and total amount)                                                                                                                                                  | 10                           |
| Outcome data             | 15* | Report numbers of outcome events or summary measures over time                                                                                                                                               | 11-12 (Table 1)              |
| Main results             | 16  | (a) Give unadjusted estimates and, if applicable, confounder-adjusted estimates and their precision (eg, 95% confidence interval). Make clear which confounders were adjusted for and why they were included | 13, 14 (Tables 2,3)          |
|                          |     | (b) Report category boundaries when continuous variables were categorized                                                                                                                                    | 11, 12 Table 1 BMI           |
|                          |     | (c) If relevant, consider translating estimates of relative risk into absolute risk for a meaningful time period                                                                                             | NA                           |
| Other analyses           | 17  | Report other analyses done—eg analyses of subgroups and interactions, and sensitivity analyses                                                                                                               | 16                           |
| <b>Discussion</b>        |     |                                                                                                                                                                                                              |                              |
| Key results              | 18  | Summarise key results with reference to study objectives                                                                                                                                                     | 16                           |
| <b>Limitations</b>       |     |                                                                                                                                                                                                              |                              |
| Interpretation           | 20  | Give a cautious overall interpretation of results considering objectives, limitations, multiplicity of analyses, results from similar studies, and other relevant evidence                                   | 16-19                        |
| Generalisability         | 21  | Discuss the generalisability (external validity) of the study results                                                                                                                                        | 19                           |
| <b>Other information</b> |     |                                                                                                                                                                                                              |                              |
| Funding                  | 22  | Give the source of funding and the role of the funders for the present study and, if applicable, for the original study on which the present article is based                                                | 20                           |

\*Give information separately for cases and controls in case-control studies and, if applicable, for exposed and unexposed groups in cohort and cross-sectional studies.

1  
2 **Note:** An Explanation and Elaboration article discusses each checklist item and gives methodological background and published examples of transparent reporting. The STROBE  
3 checklist is best used in conjunction with this article (freely available on the Web sites of PLoS Medicine at <http://www.plosmedicine.org/>, Annals of Internal Medicine at  
4 <http://www.annals.org/>, and Epidemiology at <http://www.epidem.com/>). Information on the STROBE Initiative is available at [www.strobe-statement.org](http://www.strobe-statement.org).  
5  
6  
7  
8  
9  
10  
11  
12  
13  
14  
15  
16  
17  
18  
19  
20  
21  
22  
23  
24  
25  
26  
27  
28  
29  
30  
31  
32  
33  
34  
35  
36  
37  
38  
39  
40  
41  
42  
43  
44  
45  
46

For peer review only
